# Supplementary material for: Intrinsically disordered linkers determine the interplay between phase separation and gelation in multivalent proteins
Source: eLife journal article supplement (doi:10.7554/elife.30294), 2017-11-01
Supplement: supp [file elife-30294-supp-v1.zip]

Archive with 4 entries (4 files):
- elife_poa_e30294_Supplementary_File_1.xlsx
- elife_poa_e30294_Video_2.mp4
- elife_poa_e30294_Transparent_Reporting_File.pdf
- elife_poa_e30294_Video_1.mp4
