# Supplementary material for: Intrinsically disordered linkers determine the interplay between phase separation and gelation in multivalent proteins
Source: eLife journal article supplement (doi:10.7554/elife.30294), 2017-11-01
Supplement: supp [file elife-30294-supp-v1.zip › elife_poa_e30294_Supplementary_File_1.xlsx]

## Sheet: Sheet1
	UniProt ID	Protein Name	Linker length	Start	End	Disorder	Delta	Fpos	Fneg	Phase diagram region	Sequence	PANTHER GO-Slim Molecular Function	PANTHER GO-Slim Biological Process	PANTHER GO-Slim Cellular Component
	Q8IWY8	Zinc finger and SCAN domain-containing protein 29	142	104	246	0.594	0.2	0.183	0.155	2	RSSVTVSVKGQEVRLEKMTPPKSSQELLSVRQESVEPQPRGVPKKERARSPDLGPQEQMNPKEKLKPFQRSGLPFPKSGVVSRLEQGEPWIPDLLGSKEKELPSGSHIGDRRVHADLLPSKKDRRSWVEQDHWSFEDEKVAG	sequence-specific DNA binding RNA polymerase II transcription factor activity(GO:0000981)	biosynthetic process(GO:0009058);cellular process(GO:0009987);nitrogen compound metabolic process(GO:0006807)	intracellular(GO:0005622);nucleus(GO:0005634)
	Q8IWY8	Zinc finger and SCAN domain-containing protein 29	78	331	409	0.626	-0.188	0.026	0.205	1	MSAQVIALPSNGLEAAASHSGLVGSDAETEEPGQRGWQHEEGAEEAVAQESDSDDMDLEATPQDPNSAAPVVFRSPGG	sequence-specific DNA binding RNA polymerase II transcription factor activity(GO:0000981)	biosynthetic process(GO:0009058);cellular process(GO:0009987);nitrogen compound metabolic process(GO:0006807)	intracellular(GO:0005622);nucleus(GO:0005634)
	Q8IWY8	Zinc finger and SCAN domain-containing protein 29	185	494	679	0.589	-0.142	0.13	0.184	2	VSVRVAAPPNDGQEETASCPVQGTSEAEAQKQAEEADEATEEDSDDDEEDTEIPPGAVITRAPVLFQSPRGFEAGFENEDNSKRDISEEVQLHRTLLARSERKIPRYLHQGKGNESDCRSGRQWAKTSGEKRGKLTLPEKSLSEVLSQQRPCLGERPYKYLKYSKSFGPNSLLMHQVSHQVENPY	sequence-specific DNA binding RNA polymerase II transcription factor activity(GO:0000981)	biosynthetic process(GO:0009058);cellular process(GO:0009987);nitrogen compound metabolic process(GO:0006807)	intracellular(GO:0005622);nucleus(GO:0005634)
	Q15772	Striated muscle preferentially expressed protein kinase	35	1154	1189	0.637	0.101	0.114	0.229	2	EEPRTAASGPSSKLEKMPSIPEEPEQGELERLSIP
	Q15772	Striated muscle preferentially expressed protein kinase	58	812	870	0.795	-0.044	0.103	0.138	1	RPGGSTSPFSSPITSDEEYLSPPEEFPEPGETWPRTPTMKPSPSQNRRSSDTGSKAPP
	Q66K41	Zinc finger protein 385C	120	102	222	0.79	-0.041	0.092	0.1	1	ARKLKAVEAAKSKQRPHTQAQDGAVVSPIPTLASGAPGEPQSKVPAAPPLGPPLQPPPTPDPTCREPAHSELLDAASSSSSSSCPPCSPEPGREAPGPEPAAAAVGSSMSGEGRSEKGHL	RNA binding(GO:0003723);protein binding(GO:0005515)	apoptotic process(GO:0006915);intracellular signal transduction(GO:0035556);regulation of biological process(GO:0050789);response to stimulus(GO:0050896)
	Q66K41	Zinc finger protein 385C	45	246	291	0.832	0.321	0.267	0.022	2	RWMMEGQRGAPRRSRGRPVSRGGAGHKAKRVTGGRGGRQGPSPAF	RNA binding(GO:0003723);protein binding(GO:0005515)	apoptotic process(GO:0006915);intracellular signal transduction(GO:0035556);regulation of biological process(GO:0050789);response to stimulus(GO:0050896)
	P55265	Double-stranded RNA-specific adenosine deaminase	46	570	616	0.679	0.08	0.13	0.196	2	LEEAKAKDSGKSEESSHYSTEKESEKTAESQTPTPSATSFFSGKSP	DNA binding(GO:0003677);RNA binding(GO:0003723);deaminase activity(GO:0019239);hydrolase activity(GO:0016787);kinase activator activity(GO:0019209);protein binding(GO:0005515)	RNA localization(GO:0006403);cell cycle(GO:0007049);immune response(GO:0006955);protein metabolic process(GO:0019538);purine nucleobase metabolic process(GO:0006144)
	P55265	Double-stranded RNA-specific adenosine deaminase	94	202	296	0.699	0.036	0.032	0.181	1	QAWNQHSGVVRPDGHSQGAPNSDPSLEPEDRNSTSVSEDLLEPFIAVSAQAWNQHSGVVRPDSHSQGSPNSDPGLEPEDSNSTSALEDPLEFLD	DNA binding(GO:0003677);RNA binding(GO:0003723);deaminase activity(GO:0019239);hydrolase activity(GO:0016787);kinase activator activity(GO:0019209);protein binding(GO:0005515)	RNA localization(GO:0006403);cell cycle(GO:0007049);immune response(GO:0006955);protein metabolic process(GO:0019538);purine nucleobase metabolic process(GO:0006144)
	P55265	Double-stranded RNA-specific adenosine deaminase	145	360	505	0.565	0.066	0.131	0.131	2	RERMQIKRNTNSVPETAPAAIPETKRNAEFLTCNIPTSNASNNMVTTEKVENGQEPVIKLENRQEARPEPARLKPPVHYNGPSKAGYVDFENGQWATDDIPDDLNSIRAAPGEFRAIMEMPSFYSHGLPRCSPYKKLTECQLKNP	DNA binding(GO:0003677);RNA binding(GO:0003723);deaminase activity(GO:0019239);hydrolase activity(GO:0016787);kinase activator activity(GO:0019209);protein binding(GO:0005515)	RNA localization(GO:0006403);cell cycle(GO:0007049);immune response(GO:0006955);protein metabolic process(GO:0019538);purine nucleobase metabolic process(GO:0006144)
	P55265	Double-stranded RNA-specific adenosine deaminase	47	681	728	0.524	-0.267	0.085	0.149	1	HGEATNSMASDNQPEGMISESLDNLESMMPNKVRKIGELVRYLNTNP	DNA binding(GO:0003677);RNA binding(GO:0003723);deaminase activity(GO:0019239);hydrolase activity(GO:0016787);kinase activator activity(GO:0019209);protein binding(GO:0005515)	RNA localization(GO:0006403);cell cycle(GO:0007049);immune response(GO:0006955);protein metabolic process(GO:0019538);purine nucleobase metabolic process(GO:0006144)
	O14936	Peripheral plasma membrane protein CASK	48	569	617	0.706	-0.187	0.104	0.062	1	PSYRTQSSSCERDSPSTSRQSPANGHSSTNNSVSDLPSTTQPKGRQIY	nucleotide kinase activity(GO:0019201);protein kinase activity(GO:0004672)	asymmetric protein localization(GO:0008105);neurotransmitter secretion(GO:0007269);signal transduction(GO:0007165);synaptic transmission(GO:0007268)	cell junction(GO:0030054);plasma membrane(GO:0005886)
	O14936	Peripheral plasma membrane protein CASK	33	458	491	0.688	-0.055	0.091	0.152	1	RVTPPPTSPYLNGDSPESANGDMDMENVTRVRL	nucleotide kinase activity(GO:0019201);protein kinase activity(GO:0004672)	asymmetric protein localization(GO:0008105);neurotransmitter secretion(GO:0007269);signal transduction(GO:0007165);synaptic transmission(GO:0007268)	cell junction(GO:0030054);plasma membrane(GO:0005886)
	Q92576	PHD finger protein 3	153	773	926	0.592	0.122	0.209	0.176	3	EDKKTEILDPDTLENQATVEFHSGDKTMECEKLGLSKHTTNDRTKYIDDTVKHKVKILKRESGEGRNSSDCRDNEIKKWQLAPLRKMGQPVLPRRSSEEKSEKIPKESTTVTCTGEKASKPGTHEKQEMKKKKVEKGVLNVHPAASASKPSAD	sequence-specific DNA binding transcription factor activity(GO:0003700)	transcription elongation from RNA polymerase II promoter(GO:0006368)
	Q92576	PHD finger protein 3	161	1039	1200	0.597	0.274	0.143	0.211	3	EKEQREVERRPITKITHKGEIEIESDAPMKEQEAAMEIQEPAANKSLEKPEGSEKQKEEVDSMSKDTTSQHRQHLFDLNCKICIGRMAPPVDDLSPKKVKVVVGVARKHSDNEAESIADALSSTSNILASEFFEEEKQESPKSTFSPAPRPEMPGTVEVES	sequence-specific DNA binding transcription factor activity(GO:0003700)	transcription elongation from RNA polymerase II promoter(GO:0006368)
	O00425	Insulin-like growth factor 2 mRNA-binding protein 3	62	346	408	0.529	-0.194	0.032	0.097	1	KIRESYENDIASMNLQAHLIPGLNLNALGLFPPTSGMPPPTSGPPSAMTPPYPQFEQSETET	catalytic activity(GO:0003824);mRNA binding(GO:0003729);protein binding(GO:0005515)	RNA splicing, via transesterification reactions(GO:0000375);induction of apoptosis(GO:0006917);intracellular protein transport(GO:0006886);mRNA splicing, via spliceosome(GO:0000398);neurological system process(GO:0050877);nuclear transport(GO:0051169);protein metabolic process(GO:0019538);signal transduction(GO:0007165);transcription from RNA polymerase II promoter(GO:0006366)	ribonucleoprotein complex(GO:0030529)
	O00425	Insulin-like growth factor 2 mRNA-binding protein 3	47	151	198	0.621	-0.205	0.149	0.064	1	VAYIPDEMAAQQNPLQQPRGRRGLGQRGSSRQGSPGSVSKQKPCDLP	catalytic activity(GO:0003824);mRNA binding(GO:0003729);protein binding(GO:0005515)	RNA splicing, via transesterification reactions(GO:0000375);induction of apoptosis(GO:0006917);intracellular protein transport(GO:0006886);mRNA splicing, via spliceosome(GO:0000398);neurological system process(GO:0050877);nuclear transport(GO:0051169);protein metabolic process(GO:0019538);signal transduction(GO:0007165);transcription from RNA polymerase II promoter(GO:0006366)	ribonucleoprotein complex(GO:0030529)
	A1X283	SH3 and PX domain-containing protein 2B	24	204	228	0.527	-0.084	0.042	0.333	3	TCLEGQDGVQDEFSLQPEEEEKYT		intracellular signal transduction(GO:0035556)
	A1X283	SH3 and PX domain-containing protein 2B	102	273	375	0.766	0.215	0.176	0.127	2	SYLKKNSGEPLPPKPGPGSPSHPGALDLDGVSRQQNAVGREKELLSSQRDGRFEGRPVPDGDAKQRSPKMRQRPPPRRDMTIPRGLNLPKPPIPPQVEEEYY		intracellular signal transduction(GO:0035556)
	A1X283	SH3 and PX domain-containing protein 2B	33	126	159	0.533	0.054	0.121	0.212	2	PEDLNPPKEEHIGKKKSGGDQTSVDPMVLEQYV		intracellular signal transduction(GO:0035556)
	P17040	Zinc finger and SCAN domain-containing protein 20	142	569	711	0.551	0.248	0.077	0.232	2	MRARAAVRAMGTVREAAGLPRCGQSSAETDAQEAWGEVANEDAVKPSTLCPKAPDMGFEMRHEDEDQISEQDIFEGLPGALSKCPTEAVCQPLDWGEDSENENEDEGQWGNPSQEQWQESSSEEDLEKLIDHQGLYLAEKPY
	P17040	Zinc finger and SCAN domain-containing protein 20	59	817	876	0.613	-0.187	0.051	0.119	1	LGGNPDQCSEPGGNFAQSPSFSAHWRNSTEETAPEQPQSISKDLNSPGPHSTNSGEKLY
	P17040	Zinc finger and SCAN domain-containing protein 20	187	137	324	0.597	0.285	0.096	0.166	2	GQSGLELHTEETRPLKTGEEAQSFQLQPVDPWPEGQSQKKGVKNTCPDLPNHLNAEVAPQPLKESAVLTPRVPTLPKMGSVGDWEVTAESQEALGPGKHAEKELCKDPPGDDCGNSVCLGVPVSKPSNTSEKEQGPEFWGLSLINSGKRSTADYSLDNEPAQALTWRDSRAWEEQYQWDVEDMKVSG
	Q86TC9	Myopalladin	77	359	436	0.56	-0.146	0.065	0.104	1	EGVSSSDSEGDPNKEEMNRIQKPNEVSSPPTTSAVIPPAVPQAQHLVAQPRVATIQQCQSPTNYLQGLDGKPIIAAP	actin binding(GO:0003779)	cell differentiation(GO:0030154);cellular component movement(GO:0006928);cytoskeleton organization(GO:0007010);heart development(GO:0007507);localization(GO:0051179);locomotion(GO:0040011);regulation of biological process(GO:0050789);single-multicellular organism process(GO:0044707)	cytoplasm(GO:0005737);organelle(GO:0043226)
	Q86TC9	Myopalladin	37	1037	1074	0.57	0.162	0.243	0.108	3	QSLPIRSRLTSAGQSHRGRSRVQERDKEPLQERFFRP	actin binding(GO:0003779)	cell differentiation(GO:0030154);cellular component movement(GO:0006928);cytoskeleton organization(GO:0007010);heart development(GO:0007507);localization(GO:0051179);locomotion(GO:0040011);regulation of biological process(GO:0050789);single-multicellular organism process(GO:0044707)	cytoplasm(GO:0005737);organelle(GO:0043226)
	Q9UQR0	Sex comb on midleg-like protein 2	164	466	630	0.607	-0.064	0.116	0.11	1	PFSSSRGHTHSSAEHDKNQSAKEDVTERQSTKRSPQQTVPYVVPLSPKLPKTKEYASEGEPLFAGGSAIPKEENLSEDSKSSSLNSGNYLNPACRNPMYIHTSVSQDFSRSVPGTTSSPLVGDISPKSSPHEVKFQMQRKSEAPSYIAVPDPSVLKQGFSKDPS	chromatin binding(GO:0003682);sequence-specific DNA binding transcription factor activity(GO:0003700)	cell cycle(GO:0007049);regulation of transcription from RNA polymerase II promoter(GO:0006357)
	Q9UQR0	Sex comb on midleg-like protein 2	113	244	357	0.577	0.259	0.186	0.044	1	VPIVKNIAKTESSPSEASQHSMQSPQKTTLILPTQQVRRSSRIKPPGPTAVPKRSSSVKNITPRKKGPNSGKKEKPLPVICSTSAASLKSLTRDRGMLYKDVASGPCKIVMST	chromatin binding(GO:0003682);sequence-specific DNA binding transcription factor activity(GO:0003700)	cell cycle(GO:0007049);regulation of transcription from RNA polymerase II promoter(GO:0006357)
	Q9UPR6	Zinc finger RNA-binding protein 2	24	296	320	0.762	-0.038	0.208	0.042	2	RKKEAAQKTGVQPNGSPRGVQAQL	DNA binding(GO:0003677);deaminase activity(GO:0019239);hydrolase activity(GO:0016787);kinase activator activity(GO:0019209);mRNA binding(GO:0003729);protein binding(GO:0005515)	RNA localization(GO:0006403);anterior/posterior axis specification(GO:0009948);apoptotic process(GO:0006915);cell cycle(GO:0007049);mRNA processing(GO:0006397);neurological system process(GO:0050877);nucleobase-containing compound transport(GO:0015931);protein metabolic process(GO:0019538);purine nucleobase metabolic process(GO:0006144);response to interferon-gamma(GO:0034341);spermatogenesis(GO:…
	Q9UPR6	Zinc finger RNA-binding protein 2	166	493	659	0.657	0.112	0.199	0.163	3	RLQYRKKVNPDLPIATEPSSRARKVLEERMRKQRHLAEERLEQLRRWHAERRRLEEEPPQDVPPHAPPDWAQPLLMGRPESPASAPLQPGRRPASSDDRHVMCKHATIYPTEQELLAVQRAVSHAERALKLVSDTLAEEDRGRREEEGDKRSSVAPQTRVLKGVMR	DNA binding(GO:0003677);deaminase activity(GO:0019239);hydrolase activity(GO:0016787);kinase activator activity(GO:0019209);mRNA binding(GO:0003729);protein binding(GO:0005515)	RNA localization(GO:0006403);anterior/posterior axis specification(GO:0009948);apoptotic process(GO:0006915);cell cycle(GO:0007049);mRNA processing(GO:0006397);neurological system process(GO:0050877);nucleobase-containing compound transport(GO:0015931);protein metabolic process(GO:0019538);purine nucleobase metabolic process(GO:0006144);response to interferon-gamma(GO:0034341);spermatogenesis(GO:…
	Q9UPR6	Zinc finger RNA-binding protein 2	125	344	469	0.63	-0.014	0.12	0.104	1	QKVFKLHAKLGKPIPTLEPALATESPPGAEAKPTSPTGPSVCASSRPALAKRPVASKALCEGPPEPQAAGCRPQWGKPAQPKLEGPGAPTQGGSKEAPAGCSDAQPVGPEYVEEVFSDEGRVLRF	DNA binding(GO:0003677);deaminase activity(GO:0019239);hydrolase activity(GO:0016787);kinase activator activity(GO:0019209);mRNA binding(GO:0003729);protein binding(GO:0005515)	RNA localization(GO:0006403);anterior/posterior axis specification(GO:0009948);apoptotic process(GO:0006915);cell cycle(GO:0007049);mRNA processing(GO:0006397);neurological system process(GO:0050877);nucleobase-containing compound transport(GO:0015931);protein metabolic process(GO:0019538);purine nucleobase metabolic process(GO:0006144);response to interferon-gamma(GO:0034341);spermatogenesis(GO:…
	Q96B97	SH3 domain-containing kinase-binding protein 1	121	154	275	0.564	0.062	0.157	0.174	2	ELSGESDELGISQDEQLSKSSLRETTGSESDGGDSSSTKSEGANGTVATAAIQPKKVKGVGFGDIFKDKPIKLRPRSIEVENDFLPVEKTIGKKLPATTATPDSSKTEMDSRTKSKDYCKV	receptor binding(GO:0005102)	nucleobase-containing compound metabolic process(GO:0006139)
	Q96B97	SH3 domain-containing kinase-binding protein 1	51	55	106	0.533	0.081	0.275	0.137	3	EIKKEMKKDPLTNKAPEKPLHEVPSGNSLLSSETILRTNKRGERRRRRCQV	receptor binding(GO:0005102)	nucleobase-containing compound metabolic process(GO:0006139)
	O94888	UBX domain-containing protein 7	174	234	408	0.616	0.465	0.103	0.218	2	RTGQKLVEWHQLDVSSFLDQVTGFLGEHGQLDGLSSSPPKKCARSESLIDASEDSQLEAAIRASLQETHFDSTQTKQDSRSDEESESELFSGSEEFISVCGSDEEEEVENLAKSRKSPHKDLGHRKEENRRPLTEPPVRTDPGTATNHQGLPAVDSEILEMPPEKADGVVEGID
	O94888	UBX domain-containing protein 7	93	57	150	0.508	0.092	0.151	0.172	2	EEPSTSSASVSTVRPHTEEEVRAPIPQKQEILVEPEPLFGAPKRRRPARSIFDGFRDFQTETIRQEQELRNGGAIDKKLTTLADLFRPPIDLM
	Q15746	Myosin light chain kinase, smooth muscle	51	1188	1239	0.732	0.122	0.196	0.118	2	DDAPASENTKAPEMKSRRPKSSLPPVLGTESDATVKKKPAPKTPPKAAMPP		cellular component movement(GO:0006928);localization(GO:0051179);locomotion(GO:0040011);muscle contraction(GO:0006936);regulation of biological process(GO:0050789)
	Q15746	Myosin light chain kinase, smooth muscle	164	251	415	0.751	0.223	0.159	0.098	2	QGLDSANRSFVRETKATNSDVRKEVTNVISKESKLDSLEAAAKSKNCSSPQRGGSPPWAANSQPQPPRESKLESCKDSPRTAPQTPVLQKTSSSITLQAARVQPEPRAPGLGVLSPSGEERKRPAPPRPATFPTRQPGLGSQDVVSKAANRRIPMEGQRDSAFP		cellular component movement(GO:0006928);localization(GO:0051179);locomotion(GO:0040011);muscle contraction(GO:0006936);regulation of biological process(GO:0050789)
	Q15746	Myosin light chain kinase, smooth muscle	48	1417	1465	0.612	0.373	0.104	0.354	3	QESELTTVGEKPEEPKDEVEVSDDDEKEPEVDYRTVTINTEQKVSDFY		cellular component movement(GO:0006928);localization(GO:0051179);locomotion(GO:0040011);muscle contraction(GO:0006936);regulation of biological process(GO:0050789)
	Q8NI35	InaD-like protein	82	1158	1240	0.707	0.003	0.146	0.171	2	SLSSTPRVIPNVHNKANKITGNQNQDTQEKKEKRQGTAPPPMKLPPPYKALTDDSDENEEEDAFTDQKIRQRYADLPGELHI		cellular process(GO:0009987)
	Q8NI35	InaD-like protein	64	1613	1677	0.599	-0.295	0.109	0.047	1	RLRAGSWTSARTTSQNSQGSQQSAHSSCHPSFAPVITGLQNLVGTKRVSDPSQKNSGTDMEPRT		cellular process(GO:0009987)
	Q8TDY8	Immunoglobulin superfamily DCC subclass member 4	23	729	752	0.606	-0.1	0.174	0.087	2	AVWKGKTEKAPAPDMPIQRGPPL
	Q8TDY8	Immunoglobulin superfamily DCC subclass member 4	19	614	633	0.596	-0.301	0.053	0	1	QWMHHRTPSMHNQSHVPFA
	Q14554	Protein disulfide-isomerase A5	17	382	399	0.643	0.021	0	0.235	1	PEAPPPPEPTWEEQQTS	protein disulfide isomerase activity(GO:0003756)	cellular process(GO:0009987);response to stress(GO:0006950)
	Q14554	Protein disulfide-isomerase A5	18	260	278	0.578	-0.042	0	0.167	1	QPPQPQVPETPWADEGGS	protein disulfide isomerase activity(GO:0003756)	cellular process(GO:0009987);response to stress(GO:0006950)
	Q9BWV1	Brother of CDO	69	409	478	0.726	-0.096	0.087	0.072	1	SRPSITPRLWQDAELATGTPPVSPSKLGNPEQMLRGQPALPRPPTSVGPASPQCPGEKGQGAPAEAPII
	Q9BWV1	Brother of CDO	46	562	608	0.806	-0.05	0.152	0.13	2	MVTFRTGRRPKPEIMASKEQQIQRDDPGASPQSSSQPDHGRLSPPE
	Q8N1G0	Zinc finger protein 687	115	1017	1132	0.663	0.099	0.174	0.078	2	EGIKRVYPCRYCTEGKRTFSSRLILEKHVQVRHGLQLGAQSPGRGTTLARGSSARAQGPGRKRRQSSDSCSEEPDSTTPPAKSPRGGPGSGGHGPLRYRSSSSTEQSLMMGLRVE	sequence-specific DNA binding transcription factor activity(GO:0003700)	regulation of transcription from RNA polymerase II promoter(GO:0006357)
	Q8N1G0	Zinc finger protein 687	41	1160	1201	0.754	0.002	0.122	0.171	2	KRRGVGKASALGLGDGEEEAPPSRSDPDGGDSPLPASGGPL	sequence-specific DNA binding transcription factor activity(GO:0003700)	regulation of transcription from RNA polymerase II promoter(GO:0006357)
	A1A4S6	Rho GTPase-activating protein 10	184	552	736	0.671	-0.093	0.092	0.098	1	ALMDLKFQNIVVEILIENHEKIFRTPPDTTFPEPTCLSASPPNAPPRQSKRQGQRTKRPVAVYNLCLELEDGDNPYPSKEDTPTSSLDSLSSPSPVTTAVPGPPGPDKNHLLADGGSFGDWASTIPGQTRSSMVQWLNPQSPTTTSSNSAVTPLSPGSSPFPFSPPATVADKPPESIRSRKARA	protein binding(GO:0005515);small GTPase regulator activity(GO:0005083)	cell-cell adhesion(GO:0016337);signal transduction(GO:0007165)
	A1A4S6	Rho GTPase-activating protein 10	17	250	267	0.514	-0.002	0.294	0.059	3	MNKIRQNPKDHKRASQF	protein binding(GO:0005515);small GTPase regulator activity(GO:0005083)	cell-cell adhesion(GO:0016337);signal transduction(GO:0007165)
	Q9UNZ2	NSFL1 cofactor p47	32	259	291	0.631	-0.323	0.062	0.094	1	KLGSTAPQVLSTSSPAQQAENEAKASSSILID	phosphatase regulator activity(GO:0019208);phosphoprotein phosphatase activity(GO:0004721);protein binding(GO:0005515)	catabolic process(GO:0009056);cell communication(GO:0007154);cellular component biogenesis(GO:0044085);organelle organization(GO:0006996);phosphate-containing compound metabolic process(GO:0006796);proteolysis(GO:0006508);regulation of biological process(GO:0050789);response to external stimulus(GO:0009605);response to stress(GO:0006950)	cytosol(GO:0005829);nucleus(GO:0005634)
	Q9UNZ2	NSFL1 cofactor p47	136	49	185	0.666	0.154	0.125	0.176	2	DIVTISQATPSSVSRGTAPSDNRVTSFRDLIHDQDEDEEEEEGQRFYAGGSERSGQQIVGPPRKKSPNELVDDLFKGAKEHGAVAVERVTKSPGETSKPRPFAGGGYRLGAAPEEESAYVAGEKRQHSSQDVHVVL	phosphatase regulator activity(GO:0019208);phosphoprotein phosphatase activity(GO:0004721);protein binding(GO:0005515)	catabolic process(GO:0009056);cell communication(GO:0007154);cellular component biogenesis(GO:0044085);organelle organization(GO:0006996);phosphate-containing compound metabolic process(GO:0006796);proteolysis(GO:0006508);regulation of biological process(GO:0050789);response to external stimulus(GO:0009605);response to stress(GO:0006950)	cytosol(GO:0005829);nucleus(GO:0005634)
	P39880	Homeobox protein cut-like 1	107	1016	1123	0.713	-0.006	0.037	0.103	1	PVQGQQQGPVLHSVTSLQDPLQQGCVSSESTPKTSASCSPAPESPMSSSESVKSLTELVQQPCPPIEASKDSKPPEPSDPPASDSQPTTPLPLSGHSALSIQELVAM	sequence-specific DNA binding transcription factor activity(GO:0003700)	regulation of transcription from RNA polymerase II promoter(GO:0006357)
	P39880	Homeobox protein cut-like 1	45	1201	1246	0.705	-0.026	0.178	0.089	2	MKRMEKKAYMKRRHSSVSDSQPCEPPSVGTEYSQGASPQPQHQLK	sequence-specific DNA binding transcription factor activity(GO:0003700)	regulation of transcription from RNA polymerase II promoter(GO:0006357)
	Q5TCZ1	SH3 and PX domain-containing protein 2A	138	318	456	0.561	-0.048	0.145	0.109	2	SYLKKAKDDLPTRKKNLAGPVEIIGNIMEISNLLNKKASGDKETPPAEGEGHEAPIAKKEISLPILCNASNGSAVGVPDRTVSRLAQGSPAVARIAPQRAQISSPNLRTRPPPRRESSLGFQLPKPPEPPSVEVEYYT		intracellular signal transduction(GO:0035556)
	Q5TCZ1	SH3 and PX domain-containing protein 2A	56	218	274	0.509	-0.048	0.232	0.143	3	TYLEAQNGTRDDSDINTSKTGEVSKRRKAHLRRLDRRWTLGGMVNRQHSREEKYVT		intracellular signal transduction(GO:0035556)
	P54727	UV excision repair protein RAD23 homolog B	51	226	277	0.727	-0.384	0.02	0.059	1	LMGIPGDRESQAVVDPPQAASTGAPQSSAVAAAAATTTATTTTTSSGGHPL	damaged DNA binding(GO:0003684)	DNA repair(GO:0006281)
	P54727	UV excision repair protein RAD23 homolog B	33	333	366	0.653	-0.232	0	0.061	1	QEAGGQGGGGGGGSGGIAEAGSGHMNYIQVTPQ	damaged DNA binding(GO:0003684)	DNA repair(GO:0006281)
	P54727	UV excision repair protein RAD23 homolog B	112	78	190	0.768	-0.178	0.045	0.071	1	KAVSTPAPATTQQSAPASTTAVTSSTTTTVAQAPTPVPALAPTSTPASITPASATASSEPAPASAAKQEKPAEKPAETPVATSPTATDSTSGDSSRSNLFEDATSALVTGQS	damaged DNA binding(GO:0003684)	DNA repair(GO:0006281)
	P54725	UV excision repair protein RAD23 homolog A	34	199	233	0.846	0.034	0	0.176	1	LTGIPGSPEPEHGSVQESQVSEQPATEAAGENPL	damaged DNA binding(GO:0003684)	DNA repair(GO:0006281)
	P54725	UV excision repair protein RAD23 homolog A	83	80	163	0.878	0.201	0.048	0.133	1	KAGQGTSAPPEASPTAAPESSTSFPPAPTSGMSHPPPAAREDKSPSEESAPTTSPESVSGSVPSSGSSGREEDAASTLVTGSE	damaged DNA binding(GO:0003684)	DNA repair(GO:0006281)
	P54725	UV excision repair protein RAD23 homolog A	31	289	320	0.577	-0.236	0	0.226	1	GELADISDVEGEVGAIGEEAPQMNYIQVTPQ	damaged DNA binding(GO:0003684)	DNA repair(GO:0006281)
	Q9UDY2	Tight junction protein ZO-2	128	383	511	0.734	0.325	0.125	0.188	2	RDSQQTLINIPSLNDSDSEIEDISEIESNRSFSPEERRHQYSDYDYHSSSEKLKERPSSREDTPSRLSRMGATPTPFKSTGDIAGTVVPETNKEPRYQEDPPAPQPKAAPRTFLRPSPEDEAIYGPNT		anatomical structure morphogenesis(GO:0009653);cellular process(GO:0009987)	plasma membrane(GO:0005886)
	Q9UDY2	Tight junction protein ZO-2	181	118	299	0.725	0.368	0.249	0.193	3	RPRKVQVAALQASPPLDQDDRAFEVMDEFDGRSFRSGYSERSRLNSHGGRSRSWEDSPERGRPHERARSRERDLSRDRSRGRSLERGLDQDHARTRDRSRGRSLERGLDHDFGPSRDRDRDRSRGRSIDQDYERAYHRAYDPDYERAYSPEYRRGARHDARSRGPRSRSREHPHSRSPSPE		anatomical structure morphogenesis(GO:0009653);cellular process(GO:0009987)	plasma membrane(GO:0005886)
	Q9NQZ3	Deleted in azoospermia protein 1	98	110	208	0.563	-0.301	0.082	0.041	1	LGPAIRKQKLCARHVQPRPLVVNPPPPPQFQNVWRNPNTETYLQPQITPNPVTQHVQSAANPETPNSTISREASTQSSSAAASQGWVLPEGKIVPNTV	RNA binding(GO:0003723)	gamete generation(GO:0007276)
	Q9NQZ3	Deleted in azoospermia protein 1	98	275	373	0.563	-0.301	0.082	0.041	1	LGPAIRKQKLCARHVQPRPLVVNPPPPPQFQNVWRNPNTETYLQPQITPNPVTQHVQSAANPETPNSTISREASTQSSSAAASQGWVLPEGKIVPNTV	RNA binding(GO:0003723)	gamete generation(GO:0007276)
	Q12923	Tyrosine-protein phosphatase non-receptor type 13	192	1177	1369	0.682	0.033	0.109	0.13	1	QPKEKISKVPSTPVHLTNEMKNYMKKSSYMQDSAIDSSSKDHHWSRGTLRHISENSFGPSGGLREGSLSSQDSRTESASLSQSQVNGFFASHLGDQTWQESQHGSPSPSVISKATEKETFTDSNQSKTKKPGISDVTDYSDRGDSDMDEATYSSSQDHQTPKQESSSSVNTSNKMNFKTFSSSPPKPGDIFE	phosphoprotein phosphatase activity(GO:0004721)	cellular protein modification process(GO:0006464)	cytoplasm(GO:0005737)
	Q12923	Tyrosine-protein phosphatase non-receptor type 13	51	1451	1502	0.556	-0.195	0.118	0.137	2	KGQSPTSKEHVPVTPQCTLSDQNAQGQGPEKVKKTTQVKDYSFVTEENTFE	phosphoprotein phosphatase activity(GO:0004721)	cellular protein modification process(GO:0006464)	cytoplasm(GO:0005737)
	Q9H3U7	SPARC-related modular calcium-binding protein 2	63	154	217	0.671	-0.073	0.127	0.159	2	PGSVNEKLPQREGTGKTDDAAAPALETQPQGDEEDIASRYPTLWTEQVKSRQNKTNKNSVSSC	calcium ion binding(GO:0005509)
	Q9H3U7	SPARC-related modular calcium-binding protein 2	21	282	303	0.542	-0.097	0.238	0.095	2	DNTARAHPAKARDLYKGRQLQ	calcium ion binding(GO:0005509)
	O15018	PDZ domain-containing protein 2	57	672	729	0.634	-0.209	0.105	0.07	1	KLVSPSLTPCSTPTHMSRSASPNFNTSGGASAGGSDEGSSSSLGRKTPGPKDRIVME	cytokine receptor binding(GO:0005126)	ectoderm development(GO:0007398);immune response(GO:0006955);nervous system development(GO:0007399);sensory perception(GO:0007600);visual perception(GO:0007601)
	O15018	PDZ domain-containing protein 2	171	417	588	0.579	-0.146	0.129	0.181	2	SKENSAEDLLRLTSKSLPDLTSSVEDVSSWTDNEDQEADGEEDEGTSSSVQRAMPGTDEPQDVCGAEESKGNLESPKQGSNKIKLKSRLSGGVHRLESVEEYNELMVRNGDPRIRMLEVSRDGRKHSLPQLLDSSSASQEYHIVKKSTRSLSTTQVESPWRLIRPSVISII	cytokine receptor binding(GO:0005126)	ectoderm development(GO:0007398);immune response(GO:0006955);nervous system development(GO:0007399);sensory perception(GO:0007600);visual perception(GO:0007601)
	Q99543	DnaJ homolog subfamily C member 2	45	508	553	0.581	0.078	0.178	0.2	3	KLDPHQKDDINKKAFDKFKKEHGVVPQADNATPSERFEGPYTDFT
	Q99543	DnaJ homolog subfamily C member 2	21	431	452	0.777	0.026	0.19	0.048	1	ARMRQASKNTEKSTGGGGNGS
	O15015	Zinc finger protein 646	96	397	493	0.576	-0.132	0.135	0.094	1	QTGVYPCSLCSKQLFNAAALKNHVRAHHRPRQGVGENGQPSVPPAPLLLAETTHKEEEDPTTTLDHRPYKCSECGRAYRHRGSLVNHRHSHRTGEY	sequence-specific DNA binding transcription factor activity(GO:0003700)	regulation of transcription from RNA polymerase II promoter(GO:0006357)
	O15015	Zinc finger protein 646	103	515	618	0.588	0.118	0.097	0.194	2	CKAARRSADIGAEGAPSHLKVELPPDPVEAEAAPHTDQDHVCKHEEEATDITPAADKTAAHICSICGLLFEDAESLERHGLTHGAGEKENSRTETTMSPPRAF	sequence-specific DNA binding transcription factor activity(GO:0003700)	regulation of transcription from RNA polymerase II promoter(GO:0006357)
	O15015	Zinc finger protein 646	70	1608	1678	0.786	0.157	0.129	0.171	2	ARGHSQVPAQMEEARDPKAGTGEDQVVLPGQGKAQEAPSETPRGPGESVERARGGQAVTSMAAEDKERPF	sequence-specific DNA binding transcription factor activity(GO:0003700)	regulation of transcription from RNA polymerase II promoter(GO:0006357)
	O15015	Zinc finger protein 646	199	1387	1586	0.634	0.013	0.065	0.121	1	EETEREPANGQGGLDGTAASEANLTGSQGLETQLGGAEPVPHLEDGVPRPGERSQSPIRAASSEAPEPLSWGAGKAGGWPVGGGLGNHSGGWVPQFLTRSEEPEDSVHRSPCHAGDCQLNGPTLSHMDSWDNRDNSSQLQPGSHSSCSQCGKTYCQSGSLLNHNTNKTDRHYCLLCSKEFLNPVATKSHSHNHIDAQTF	sequence-specific DNA binding transcription factor activity(GO:0003700)	regulation of transcription from RNA polymerase II promoter(GO:0006357)
	O15015	Zinc finger protein 646	113	262	375	0.535	-0.213	0.097	0.15	1	TLGIYPCAICFKEFSNLMALKNHSRLHAQYRPYHCPHCPRVFRLPRELLEHQQSHEGERQEPRWEEKGMPTTNGHTDESSQDQLPSAQMLNGSAELSTSGELEDSGLEEYRPF	sequence-specific DNA binding transcription factor activity(GO:0003700)	regulation of transcription from RNA polymerase II promoter(GO:0006357)
	O15015	Zinc finger protein 646	129	1075	1204	0.569	0.095	0.109	0.194	2	QTGDFLCPVCSRCYPNLAAYRNHLRNHPRCKGSEPQVGPIPEAAGSSELQVGPIPEGGSNKPQHMAEEGPGQAEVEKLQEELKVEPLEEVARVKEEVWEETTVKGEEIEPRLETAEKGCQTEASSERPF	sequence-specific DNA binding transcription factor activity(GO:0003700)	regulation of transcription from RNA polymerase II promoter(GO:0006357)
	O15015	Zinc finger protein 646	179	874	1053	0.511	0.071	0.056	0.162	1	EATSAQPFLCCLCGMIFPGRAGYRLHRRQAHSSSGMTEGSEEEGEEEGVAEAAPARSPPLQLSEAELLNQLQREVEALDSAGYGHICGCCGQTYDDLGSLERHHQSQSSGTTADKAPSPLGVAGDAMEMVVDSVLEDIVNSVSGEGGDAKSQEGAGTPLGDSLCIQGGESLLEAQPRPF	sequence-specific DNA binding transcription factor activity(GO:0003700)	regulation of transcription from RNA polymerase II promoter(GO:0006357)
	O15015	Zinc finger protein 646	19	1281	1300	0.676	0.173	0.316	0.158	3	MERRGGGGTRKATREDRPF	sequence-specific DNA binding transcription factor activity(GO:0003700)	regulation of transcription from RNA polymerase II promoter(GO:0006357)
	O15015	Zinc finger protein 646	16	1349	1365	0.671	0.134	0.438	0.062	5	SENRRRRAGRSRRTAV	sequence-specific DNA binding transcription factor activity(GO:0003700)	regulation of transcription from RNA polymerase II promoter(GO:0006357)
	O15015	Zinc finger protein 646	142	98	240	0.78	0.142	0.099	0.162	2	APEGRRRHRPPRPKEATPHLQGETVSTDSWGQRLGSSEGWENQTKHTEETPDCESVPDPRAASGTWEDLPTRQREGLASHPGPEDGADGWGPSTNSARAPPLPIPASSLLSNLEQYLAESVVNFTGGQEPTQSPPAEEERRY	sequence-specific DNA binding transcription factor activity(GO:0003700)	regulation of transcription from RNA polymerase II promoter(GO:0006357)
	P49792	E3 SUMO-protein ligase RanBP2	30	1636	1666	0.571	-0.197	0.133	0.067	1	NQTTSAVSTPASSETSKAPKSGFEGMFTKK	protein binding(GO:0005515);small GTPase regulator activity(GO:0005083)	nuclear transport(GO:0051169);protein targeting(GO:0006605)
	P49792	E3 SUMO-protein ligase RanBP2	30	1695	1725	0.536	-0.197	0.133	0.067	1	NQTTSAVSTPASSETSKAPKSGFEGMFTKK	protein binding(GO:0005515);small GTPase regulator activity(GO:0005083)	nuclear transport(GO:0051169);protein targeting(GO:0006605)
	P49792	E3 SUMO-protein ligase RanBP2	34	1573	1607	0.505	-0.094	0.147	0.059	1	SPSTSVPAPASFKFGTSETSKAPKSGFEGMFTKK	protein binding(GO:0005515);small GTPase regulator activity(GO:0005083)	nuclear transport(GO:0051169);protein targeting(GO:0006605)
	Q9NW13	RNA-binding protein 28	152	186	338	0.76	0.329	0.151	0.355	3	VDWAVAKDKYKDTQSVSAIGEEKSHESKHQESVKKKGREEEDMEEEENDDDDDDDDEEDGVFDDEDEEEENIESKVTKPVQIQKRAVKRPAPAKSSDHSEEDSDLEESDSIDDGEELAQSDTSTEEQEDKAVQVSNKKKRKLPSDVNEGKTV
	Q9NW13	RNA-binding protein 28	42	75	117	0.521	0.44	0.405	0.119	3	VTVAKKKLRNKTKEKGKNENSECPKKEPKAKKAKVADKKARL
	Q92766	Ras-responsive element-binding protein 1	98	1416	1514	0.883	0.167	0.173	0.265	3	GRQEPKDEKGDGASTAEEGPQPAPEQEEKPPETPAEVVESAPGAGEAPAEKLAEETEGPSDGESAAEKRSSEKSDDDKKPKTDSPKSVASKADKRKKV	sequence-specific DNA binding transcription factor activity(GO:0003700)	biosynthetic process(GO:0009058);developmental process(GO:0032502);nitrogen compound metabolic process(GO:0006807);regulation of nucleobase-containing compound metabolic process(GO:0019219);response to stimulus(GO:0050896);signal transduction(GO:0007165);single-multicellular organism process(GO:0044707);transcription from RNA polymerase II promoter(GO:0006366)	intracellular(GO:0005622);nucleus(GO:0005634)
	Q92766	Ras-responsive element-binding protein 1	125	1269	1394	0.861	0.689	0.064	0.264	2	TDSQSDAETAAAAGEVLDLTSRDREQPSEGATELRQVAGDAPVEQATAETASPVHREEHGRGESHEPEEEHGTEESTGDADGAEEDASSNQSLDLDFATKLMDFKLAEGDGEAGAGGAASQEQKL	sequence-specific DNA binding transcription factor activity(GO:0003700)	biosynthetic process(GO:0009058);developmental process(GO:0032502);nitrogen compound metabolic process(GO:0006807);regulation of nucleobase-containing compound metabolic process(GO:0019219);response to stimulus(GO:0050896);signal transduction(GO:0007165);single-multicellular organism process(GO:0044707);transcription from RNA polymerase II promoter(GO:0006366)	intracellular(GO:0005622);nucleus(GO:0005634)
	P0CJ78	Zinc finger protein 865	87	464	551	0.531	-0.279	0.034	0.057	1	APPAAAAEAPKDGAASAPQPPPTFPPGPYLLPPDPPTTDSEKAAAAAAAVVYGAVPVPLLGAHPLLLGGAGTSGAGGSGASVPGKTF	transcription cofactor activity(GO:0003712)	biosynthetic process(GO:0009058);cellular process(GO:0009987);nitrogen compound metabolic process(GO:0006807);regulation of transcription from RNA polymerase II promoter(GO:0006357)	intracellular(GO:0005622);nucleus(GO:0005634)
	P0CJ78	Zinc finger protein 865	73	278	351	0.673	-0.117	0	0.027	1	PPAAGGPPQPGPHLPPLGLPAPAASAATAAAPSTVSSGPPATPVAPAPSADGSAAPAGVGVPPPATGGGDGPF	transcription cofactor activity(GO:0003712)	biosynthetic process(GO:0009058);cellular process(GO:0009987);nitrogen compound metabolic process(GO:0006807);regulation of transcription from RNA polymerase II promoter(GO:0006357)	intracellular(GO:0005622);nucleus(GO:0005634)
	Q2VWP7	Protogenin	16	604	620	0.525	-0.094	0.188	0	1	VWTSHRTPKATSVKAP
	Q2VWP7	Protogenin	23	701	724	0.501	-0.097	0.087	0.087	1	QADQTVSTPGCVSVRDRMVPPPP
	Q4VC44	FLYWCH-type zinc finger-containing protein 1	90	332	422	0.703	0.079	0.133	0.2	2	QPDMEGLEARRQQEKAVETLQAGQDGPGSQVDTLLRGVDSLLYRRGPGPLTLTRPRPRKRAKVEDQELPTQPEAPDEHQDMDADPGGPEF
	Q4VC44	FLYWCH-type zinc finger-containing protein 1	99	175	274	0.588	0.031	0.111	0.182	2	APDEQGLEARRQREKLPSLALPEGLGEPQGPEGPGGRVEEPLEGVGPWQCPEEPEPTPGLVLSKPALEEEEAPRALSLLSLPPKKRSILGLGQARPLEF
	Q4VC44	FLYWCH-type zinc finger-containing protein 1	30	480	510	0.706	0.049	0.167	0.133	2	PPDLGGLEALRQREKRPNTAQRGSPGGPEF
	Q96KR1	Zinc finger RNA-binding protein	27	356	383	0.657	-0.185	0.185	0.037	1	KKKEAALKASQNTSSSNSSTRGTQNQL	DNA binding(GO:0003677);deaminase activity(GO:0019239);hydrolase activity(GO:0016787);kinase activator activity(GO:0019209);mRNA binding(GO:0003729);protein binding(GO:0005515)	RNA localization(GO:0006403);anterior/posterior axis specification(GO:0009948);apoptotic process(GO:0006915);cell cycle(GO:0007049);mRNA processing(GO:0006397);neurological system process(GO:0050877);nucleobase-containing compound transport(GO:0015931);protein metabolic process(GO:0019538);purine nucleobase metabolic process(GO:0006144);response to interferon-gamma(GO:0034341);spermatogenesis(GO:…
	Q96KR1	Zinc finger RNA-binding protein	176	407	583	0.582	-0.261	0.102	0.074	1	QKVVKLHTKLGKPIPSTEPNVVSQATSSTAVSASKPTASPSSIAANNCTVNTSSVATSSMKGLTTTGNSSLNSTSNTKVSAVPTNMAAKKTSTPKINFVGGNKLQSTGNKAEDIKGTECVKSTPVTSAVQIPEVKQDTVSEPVTPASLAALQSDVQPVGHDYVEEVRNDEGKVIRF	DNA binding(GO:0003677);deaminase activity(GO:0019239);hydrolase activity(GO:0016787);kinase activator activity(GO:0019209);mRNA binding(GO:0003729);protein binding(GO:0005515)	RNA localization(GO:0006403);anterior/posterior axis specification(GO:0009948);apoptotic process(GO:0006915);cell cycle(GO:0007049);mRNA processing(GO:0006397);neurological system process(GO:0050877);nucleobase-containing compound transport(GO:0015931);protein metabolic process(GO:0019538);purine nucleobase metabolic process(GO:0006144);response to interferon-gamma(GO:0034341);spermatogenesis(GO:…
	Q96KR1	Zinc finger RNA-binding protein	184	607	791	0.604	0.164	0.223	0.19	3	RLQYKKKVNPDLQVEVKPSIRARKIQEEKMRKQMQKEEYWRRREEEERWRMEMRRYEEDMYWRRMEEEQHHWDDRRRMPDGGYPHGPPGPLGLLGVRPGMPPQPQGPAPLRRPDSSDDRYVMTKHATIYPTEEELQAVQKIVSITERALKLVSDSLSEHEKNKNKEGDDKKEGGKDRALKGVLR	DNA binding(GO:0003677);deaminase activity(GO:0019239);hydrolase activity(GO:0016787);kinase activator activity(GO:0019209);mRNA binding(GO:0003729);protein binding(GO:0005515)	RNA localization(GO:0006403);anterior/posterior axis specification(GO:0009948);apoptotic process(GO:0006915);cell cycle(GO:0007049);mRNA processing(GO:0006397);neurological system process(GO:0050877);nucleobase-containing compound transport(GO:0015931);protein metabolic process(GO:0019538);purine nucleobase metabolic process(GO:0006144);response to interferon-gamma(GO:0034341);spermatogenesis(GO:…
	Q5TCQ9	Membrane-associated guanylate kinase, WW and PDZ domain-containing protein 3	99	197	296	0.686	0.341	0.111	0.242	3	PSPFQPDPVDQVLFDNEFDAESQRKRTTSVSKMERMDSSLPEEEEDEDKEAINGSGNAENRERHSESSDWMKTVPSYNQTNSSMDFRNYMMRDETLEPL	nucleotide kinase activity(GO:0019201)	intracellular signal transduction(GO:0035556);neurological system process(GO:0050877);synaptic transmission(GO:0007268)	cell junction(GO:0030054);plasma membrane(GO:0005886)
	Q5TCQ9	Membrane-associated guanylate kinase, WW and PDZ domain-containing protein 3	44	833	877	0.591	-0.18	0.136	0.159	2	RKIFYGEKQPEDDSSQAFISTQNGSPRLNRAEVPARPAPQEPYD	nucleotide kinase activity(GO:0019201)	intracellular signal transduction(GO:0035556);neurological system process(GO:0050877);synaptic transmission(GO:0007268)	cell junction(GO:0030054);plasma membrane(GO:0005886)
	Q5TCQ9	Membrane-associated guanylate kinase, WW and PDZ domain-containing protein 3	86	961	1047	0.641	-0.201	0.081	0.105	1	AEEEHHGPPSGTNSARQSPALQHRPMGQSQANHIPGDRSALEGEIGKDVSTSYRHSWSDHKHLAQPDTAVISVVGSRHNQNLGCYP	nucleotide kinase activity(GO:0019201)	intracellular signal transduction(GO:0035556);neurological system process(GO:0050877);synaptic transmission(GO:0007268)	cell junction(GO:0030054);plasma membrane(GO:0005886)
	Q96PM9	Zinc finger protein 385A	36	226	262	0.706	-0.058	0.139	0.111	2	KTILEARSGLGPIKAYPRLGPPTPGEPEAPAQDRTF	mRNA binding(GO:0003729);protein binding(GO:0005515)	RNA localization(GO:0006403);apoptotic process(GO:0006915);biosynthetic process(GO:0009058);intracellular signal transduction(GO:0035556);regulation of translation(GO:0006417);response to stimulus(GO:0050896)	neuronal cell body(GO:0043025)
	Q96PM9	Zinc finger protein 385A	103	99	202	0.86	0.219	0.136	0.126	2	ARRVKGIEAAKTRGREPGVREPGDPAPPGSTPTNGDGVAPRPVSMENGLGPAPGSPEKQPGSPSPPSIPETGQGVTKGEGGTPAPASLPGGSKEEEEKAKRLL	mRNA binding(GO:0003729);protein binding(GO:0005515)	RNA localization(GO:0006403);apoptotic process(GO:0006915);biosynthetic process(GO:0009058);intracellular signal transduction(GO:0035556);regulation of translation(GO:0006417);response to stimulus(GO:0050896)	neuronal cell body(GO:0043025)
	Q9HCE7	E3 ubiquitin-protein ligase SMURF1	121	116	237	0.577	-0.037	0.099	0.132	1	LDLCKLNPSDTDAVRGQIVVSLQTRDRIGTGGSVVDCRGLLENEGTVYEDSGPGRPLSCFMEEPAPYTDSTGAAAGGGNCRFVESPSQDQRLQAQRLRNPDVRGSLQTPQNRPHGHQSPEL		biosynthetic process(GO:0009058);catabolic process(GO:0009056);cellular protein modification process(GO:0006464);nitrogen compound metabolic process(GO:0006807);proteolysis(GO:0006508);regulation of transcription from RNA polymerase II promoter(GO:0006357);response to stimulus(GO:0050896);transmembrane receptor protein serine/threonine kinase signaling pathway(GO:0007178)	cytoplasm(GO:0005737)
	Q9HCE7	E3 ubiquitin-protein ligase SMURF1	43	266	309	0.565	-0.264	0.047	0.14	1	RIPSPSGTIPGGDAAFLYEFLLQGHTSEPRDLNSVNCDELGPL		biosynthetic process(GO:0009058);catabolic process(GO:0009056);cellular protein modification process(GO:0006464);nitrogen compound metabolic process(GO:0006807);proteolysis(GO:0006508);regulation of transcription from RNA polymerase II promoter(GO:0006357);response to stimulus(GO:0050896);transmembrane receptor protein serine/threonine kinase signaling pathway(GO:0007178)	cytoplasm(GO:0005737)
	P35670	Copper-transporting ATPase 2	42	321	363	0.681	-0.143	0.071	0.071	1	GNFKVSLPDGAEGSGTDHRSSSSHSPGSPPRNQVQGTCSTTL	ATPase activity, coupled to transmembrane movement of substances(GO:0042626);cation transmembrane transporter activity(GO:0008324);pyrophosphatase activity(GO:0016462)	catabolic process(GO:0009056);cellular process(GO:0009987);nitrogen compound metabolic process(GO:0006807);nucleobase-containing compound metabolic process(GO:0006139);phosphate-containing compound metabolic process(GO:0006796)	cytoplasm(GO:0005737);integral to membrane(GO:0016021);organelle(GO:0043226);plasma membrane(GO:0005886)
	P35670	Copper-transporting ATPase 2	68	424	492	0.547	-0.327	0.059	0.059	1	ASVVSESCSTNPLGNHSAGNSMVQTTDGTPTSVQEVAPHTGRLPANHAPDILAKSPQSTRAVAPQKCF	ATPase activity, coupled to transmembrane movement of substances(GO:0042626);cation transmembrane transporter activity(GO:0008324);pyrophosphatase activity(GO:0016462)	catabolic process(GO:0009056);cellular process(GO:0009987);nitrogen compound metabolic process(GO:0006807);nucleobase-containing compound metabolic process(GO:0006139);phosphate-containing compound metabolic process(GO:0006796)	cytoplasm(GO:0005737);integral to membrane(GO:0016021);organelle(GO:0043226);plasma membrane(GO:0005886)
	Q4KMG0	Cell adhesion molecule-related/down-regulated by oncogenes	55	668	723	0.562	-0.269	0.109	0.073	1	MLTFRTSKEKTASSKNTQASSPPVGIPKYPVVSEAANNNFGVVLTDSSRHSGVPE
	Q4KMG0	Cell adhesion molecule-related/down-regulated by oncogenes	74	505	579	0.575	0.126	0.081	0.162	1	EHGTTQAEASLMVVPFETNTKAETVTLPDAAQNDDRSKRDGSETGLLSSFPVKVHPSAVESAPEKNASGISVPD
	Q01826	DNA-binding protein SATB1	77	569	646	0.9	-0.139	0.065	0.091	1	QESNAVHHHGDRPPHIIHVPAEQIQQQQQQQQQQQQQQQAPPPPQPQQQPQTGPRLPPRQPTVASPAESDEENRQKT	DNA binding(GO:0003677)	biosynthetic process(GO:0009058);cellular process(GO:0009987);nitrogen compound metabolic process(GO:0006807);regulation of transcription from RNA polymerase II promoter(GO:0006357)	intracellular(GO:0005622);nucleus(GO:0005634)
	Q01826	DNA-binding protein SATB1	119	248	367	0.592	-0.348	0.034	0.05	1	DMMVEMDSLSELSQQGANHVNFGQQPVPGNTAEQPPSPAQLSHGSQPSVRTPLPNLHPGLVSTPISPQLVNQQLVMAQLLNQQYAVNRLLAQQSLNQQYLNHPPPVSRSMNKPLEQQVS	DNA binding(GO:0003677)	biosynthetic process(GO:0009058);cellular process(GO:0009987);nitrogen compound metabolic process(GO:0006807);regulation of transcription from RNA polymerase II promoter(GO:0006357)	intracellular(GO:0005622);nucleus(GO:0005634)
	Q01826	DNA-binding protein SATB1	44	446	490	0.71	-0.022	0.136	0.114	2	DERERSLNAASAMGPAPLISTPPSRPPQVKTATIATERNGKPEN	DNA binding(GO:0003677)	biosynthetic process(GO:0009058);cellular process(GO:0009987);nitrogen compound metabolic process(GO:0006807);regulation of transcription from RNA polymerase II promoter(GO:0006357)	intracellular(GO:0005622);nucleus(GO:0005634)
	Q9UPW6	DNA-binding protein SATB2	45	435	480	0.703	-0.176	0.111	0.111	1	DERERSMNPNVSMVSSASSSPSSSRTPQAKTSTPTTDLPIKVDGA	DNA binding(GO:0003677)	biosynthetic process(GO:0009058);cellular process(GO:0009987);nitrogen compound metabolic process(GO:0006807);regulation of transcription from RNA polymerase II promoter(GO:0006357)	intracellular(GO:0005622);nucleus(GO:0005634)
	Q9UPW6	DNA-binding protein SATB2	58	558	616	0.79	0.109	0.121	0.155	2	EESRHHHSERMQHVVQLPPEPVQVLHRQQSQPAKESSPPREEAPPPPPPTEDSCAKKP	DNA binding(GO:0003677)	biosynthetic process(GO:0009058);cellular process(GO:0009987);nitrogen compound metabolic process(GO:0006807);regulation of transcription from RNA polymerase II promoter(GO:0006357)	intracellular(GO:0005622);nucleus(GO:0005634)
	Q14160	Protein scribble homolog	57	948	1005	0.553	-0.277	0.018	0.07	1	REAGGPLPPSPLPHSSPPTAAVATTSITTATPGVPGLPSLAPSLLAAALEGPYPVEE	nucleotide kinase activity(GO:0019201);receptor binding(GO:0005102)	cellular component organization(GO:0016043);nervous system development(GO:0007399);neurological system process(GO:0050877);nitrogen compound metabolic process(GO:0006807);nucleobase-containing compound metabolic process(GO:0006139);phosphate-containing compound metabolic process(GO:0006796);protein localization(GO:0008104);synaptic transmission(GO:0007268)	cell projection(GO:0042995);cytoskeleton(GO:0005856);integral to membrane(GO:0016021);intracellular(GO:0005622);plasma membrane(GO:0005886);postsynaptic membrane(GO:0045211);protein complex(GO:0043234)
	Q14160	Protein scribble homolog	51	813	864	0.615	-0.03	0.176	0.157	2	RERMVEPENAVTITPLRPEDDYSPRERRGGGLRLPLLPPESPGPLRQRHVA	nucleotide kinase activity(GO:0019201);receptor binding(GO:0005102)	cellular component organization(GO:0016043);nervous system development(GO:0007399);neurological system process(GO:0050877);nitrogen compound metabolic process(GO:0006807);nucleobase-containing compound metabolic process(GO:0006139);phosphate-containing compound metabolic process(GO:0006796);protein localization(GO:0008104);synaptic transmission(GO:0007268)	cell projection(GO:0042995);cytoskeleton(GO:0005856);integral to membrane(GO:0016021);intracellular(GO:0005622);plasma membrane(GO:0005886);postsynaptic membrane(GO:0045211);protein complex(GO:0043234)
	Q9P2Y4	Zinc finger protein 219	167	108	275	0.679	-0.106	0.12	0.126	1	QPERPRSPAARLLLELEERALLREARLGRARSSGGMQATPATEGLARPQAPSSSAFRCPYCKGKFRTSAERERHLHILHRPWKCGLCSFGSSQEEELLHHSLTAHGAPERPLAATSAAPPPQPQPQPPPQPEPRSVPQPEPEPEPEREATPTPAPAAPEEPPAPPEF	sequence-specific DNA binding RNA polymerase II transcription factor activity(GO:0000981)	biosynthetic process(GO:0009058);developmental process(GO:0032502);nitrogen compound metabolic process(GO:0006807);response to stimulus(GO:0050896);signal transduction(GO:0007165);single-multicellular organism process(GO:0044707)	intracellular(GO:0005622);nucleus(GO:0005634)
	Q9P2Y4	Zinc finger protein 219	175	325	500	0.756	0.035	0.114	0.131	1	ASKLGPLRAPGPASGPARAPQPPDLGLLAYEPLGPALLLAPAPTPAERREPPSLLGYLSLRAGEGRPNGEGAEPGPGRSFGGFRPLSSALPARARRHRAEEPEEEEEVVEAEEETWARGRSLGSLASLHPRPGEGPGHSASAAGAQARSTATQEENGLLVGGTRPEGGRGATGKD	sequence-specific DNA binding RNA polymerase II transcription factor activity(GO:0000981)	biosynthetic process(GO:0009058);developmental process(GO:0032502);nitrogen compound metabolic process(GO:0006807);response to stimulus(GO:0050896);signal transduction(GO:0007165);single-multicellular organism process(GO:0044707)	intracellular(GO:0005622);nucleus(GO:0005634)
	Q01101	Insulinoma-associated protein 1	50	318	368	0.753	0.101	0.12	0.18	2	KPRPAPAAARAPEPEAAARAEAREAPGGGSDRDTPSPGGVSESGSEDGLY		regulation of transcription from RNA polymerase II promoter(GO:0006357)
	Q01101	Insulinoma-associated protein 1	50	391	441	0.514	-0.275	0.04	0.16	1	QALQAKGAPLAPPAEDLLALYPGPDEKAPQEAAGDGEGAGVLGLSASAEC		regulation of transcription from RNA polymerase II promoter(GO:0006357)
	Q9UGM3	Deleted in malignant brain tumors 1 protein	32	1223	1255	0.526	-0.231	0.031	0.062	1	ASQSQPTPSPDTWPTSHASTAGSESSLALRLV	oxidoreductase activity(GO:0016491);receptor activity(GO:0004872);serine-type peptidase activity(GO:0008236)	cell-cell adhesion(GO:0016337);extracellular transport(GO:0006858);macrophage activation(GO:0042116);negative regulation of apoptotic process(GO:0043066);neurological system process(GO:0050877);proteolysis(GO:0006508);signal transduction(GO:0007165)
	Q9UGM3	Deleted in malignant brain tumors 1 protein	32	1352	1384	0.527	-0.231	0.031	0.062	1	ASQSQPTPSPDTWPTSHASTAGSESSLALRLV	oxidoreductase activity(GO:0016491);receptor activity(GO:0004872);serine-type peptidase activity(GO:0008236)	cell-cell adhesion(GO:0016337);extracellular transport(GO:0006858);macrophage activation(GO:0042116);negative regulation of apoptotic process(GO:0043066);neurological system process(GO:0050877);proteolysis(GO:0006508);signal transduction(GO:0007165)
	Q9UGM3	Deleted in malignant brain tumors 1 protein	32	1094	1126	0.523	-0.23	0.062	0.062	1	ASQSRPTPSPDTWPTSHASTAGSESSLALRLV	oxidoreductase activity(GO:0016491);receptor activity(GO:0004872);serine-type peptidase activity(GO:0008236)	cell-cell adhesion(GO:0016337);extracellular transport(GO:0006858);macrophage activation(GO:0042116);negative regulation of apoptotic process(GO:0043066);neurological system process(GO:0050877);proteolysis(GO:0006508);signal transduction(GO:0007165)
	Q9UGM3	Deleted in malignant brain tumors 1 protein	32	335	367	0.56	-0.209	0.062	0.062	1	APQSRPTPSPDTWPTSHASTAGPESSLALRLV	oxidoreductase activity(GO:0016491);receptor activity(GO:0004872);serine-type peptidase activity(GO:0008236)	cell-cell adhesion(GO:0016337);extracellular transport(GO:0006858);macrophage activation(GO:0042116);negative regulation of apoptotic process(GO:0043066);neurological system process(GO:0050877);proteolysis(GO:0006508);signal transduction(GO:0007165)
	Q9UGM3	Deleted in malignant brain tumors 1 protein	32	834	866	0.537	-0.241	0.062	0.062	1	VSQSRPTPSPDTWPTSHASTAGPESSLALRLV	oxidoreductase activity(GO:0016491);receptor activity(GO:0004872);serine-type peptidase activity(GO:0008236)	cell-cell adhesion(GO:0016337);extracellular transport(GO:0006858);macrophage activation(GO:0042116);negative regulation of apoptotic process(GO:0043066);neurological system process(GO:0050877);proteolysis(GO:0006508);signal transduction(GO:0007165)
	Q9UGM3	Deleted in malignant brain tumors 1 protein	32	1481	1513	0.535	-0.214	0.062	0.062	1	ASQSQPTPSPDTWPTSRASTAGSESTLALRLV	oxidoreductase activity(GO:0016491);receptor activity(GO:0004872);serine-type peptidase activity(GO:0008236)	cell-cell adhesion(GO:0016337);extracellular transport(GO:0006858);macrophage activation(GO:0042116);negative regulation of apoptotic process(GO:0043066);neurological system process(GO:0050877);proteolysis(GO:0006508);signal transduction(GO:0007165)
	Q07157	Tight junction protein ZO-1	161	262	423	0.821	0.387	0.13	0.174	2	RDERATLLNVPDLSDSIHSANASERDDISEIQSLASDHSGRSHDRPPRRSRSRSPDQRSEPSDHSRHSPQQPSNGSLRSRDEERISKPGAVSTPVKHADDHTPKTVEEVTVERNEKQTPSLPEPKPVYAQVGQPDVDLPVSPSDGVLPNSTHEDGILRPSM		anatomical structure morphogenesis(GO:0009653);cellular process(GO:0009987)	plasma membrane(GO:0005886)
	Q07157	Tight junction protein ZO-1	79	108	187	0.743	0.006	0.241	0.177	3	RKKKVQIPVSRPDPEPVSDNEEDSYDEEIHDPRSGRSGVVNRRSEKIWPRDRSASRERSLSPRSDRRSVASSQPAKPTK		anatomical structure morphogenesis(GO:0009653);cellular process(GO:0009987)	plasma membrane(GO:0005886)
	Q9NQ38	Serine protease inhibitor Kazal-type 5	24	274	298	0.508	-0.049	0.292	0.167	3	SKTDQNLGKAEEKTKVKREIVKLC	protein binding(GO:0005515)
	Q9NQ38	Serine protease inhibitor Kazal-type 5	90	827	917	0.563	0.192	0.222	0.189	3	EDRSNTGERSNTGERSNDKEDLCREFRSMQRNGKLICTRENNPVRGPYGKMHINKCAMCQSIFDREANERKKKDEEKSSSKPSNNAKDEC	protein binding(GO:0005515)
	Q9NQ38	Serine protease inhibitor Kazal-type 5	16	759	775	0.686	0.043	0.188	0.125	2	RSRSNGTGSESGKDTC	protein binding(GO:0005515)
	Q9NQ38	Serine protease inhibitor Kazal-type 5	31	963	994	0.601	-0.134	0.129	0.226	3	RAKLQEKPSHVRASQEEDSPDSFSSLDSEMC	protein binding(GO:0005515)
	Q9NQ38	Serine protease inhibitor Kazal-type 5	23	685	708	0.762	-0.009	0.043	0.174	1	EDQRNAAGHGSSGGGGGNTQDEC	protein binding(GO:0005515)
	Q8TDZ2	Protein-methionine sulfoxide oxidase MICAL1	177	755	932	0.729	0.162	0.119	0.164	2	DHKAEGSDRGPESPELPTPSENSMPPGLSTPTASQEGAGPVPDPSQPTRRQIRLSSPERQRLSSLNLTPDPEMEPPPKPPRSCSALARHALESSFVGWGLPVQSPQALVAMEKEEKESPFSSEEEEEDVPLDSDVEQALQTFAKTSGTMNNYPTWRRTLLRRAKEEEMKRFCKAQTI	actin binding(GO:0003779);structural constituent of cytoskeleton(GO:0005200)	cellular component morphogenesis(GO:0032989);cellular process(GO:0009987)	actin cytoskeleton(GO:0015629);intracellular(GO:0005622)
	Q8TDZ2	Protein-methionine sulfoxide oxidase MICAL1	84	614	698	0.616	-0.238	0.095	0.131	1	MAHSPGPVSQASPGTSSAVLFLSKLQRTLQRSRAKENAEDAGGKKLRLEMEAETPSTEVPPDPEPGVPLTPPSQHQEAGAGDLC	actin binding(GO:0003779);structural constituent of cytoskeleton(GO:0005200)	cellular component morphogenesis(GO:0032989);cellular process(GO:0009987)	actin cytoskeleton(GO:0015629);intracellular(GO:0005622)
	A1L4H1	Soluble scavenger receptor cysteine-rich domain-containing protein SSC5D	81	121	202	0.675	-0.163	0.16	0.086	1	GQRVANSRDDSTSPLDGAPWPGLLLELSPSTEEPLVTHAPRPAGNPQNASRKKSPRPKQAKSTRAPLLTTGAPRQERLRLV	oxidoreductase activity(GO:0016491);receptor activity(GO:0004872);serine-type peptidase activity(GO:0008236)	cell-cell adhesion(GO:0016337);extracellular transport(GO:0006858);immune system process(GO:0002376);negative regulation of apoptotic process(GO:0043066);proteolysis(GO:0006508);signal transduction(GO:0007165)
	A1L4H1	Soluble scavenger receptor cysteine-rich domain-containing protein SSC5D	66	405	471	0.765	-0.12	0.045	0.061	1	GMPLGYVPPTAPTDSNNSTPREAASRPPSTMTSQAPGTAGVSPPPASPTVLWEPGPEAGSPQLRLV	oxidoreductase activity(GO:0016491);receptor activity(GO:0004872);serine-type peptidase activity(GO:0008236)	cell-cell adhesion(GO:0016337);extracellular transport(GO:0006858);immune system process(GO:0002376);negative regulation of apoptotic process(GO:0043066);proteolysis(GO:0006508);signal transduction(GO:0007165)
	Q8IVV2	Lipoxygenase homology domain-containing protein 1	104	643	747	0.66	0.057	0.192	0.317	3	DKLRQLLKKERLKAKLQRKKKKRKGSDEEDEGEEEESSSSEESSSEEEEMEEEEEEEEFGPGMQEVIEQHKFEAHRWLARGKEDNELVVELVPAGKPGPERNTY	cation channel activity(GO:0005261)	cellular process(GO:0009987);response to abiotic stimulus(GO:0009628);response to external stimulus(GO:0009605)
	Q8IVV2	Lipoxygenase homology domain-containing protein 1	38	862	900	0.545	-0.029	0.079	0.211	2	LPVDESYVLPQSEEGRGGGDNNPLDNLALEQKDKSTTF	cation channel activity(GO:0005261)	cellular process(GO:0009987);response to abiotic stimulus(GO:0009628);response to external stimulus(GO:0009605)
	Q9C0E4	Glutamate receptor-interacting protein 2	18	129	147	0.529	-0.145	0.111	0.111	1	YELPPPAPENNPRIISKT	nucleotide kinase activity(GO:0019201)	intracellular signal transduction(GO:0035556);neurological system process(GO:0050877);synaptic transmission(GO:0007268)	cell junction(GO:0030054);plasma membrane(GO:0005886)
	Q9C0E4	Glutamate receptor-interacting protein 2	127	330	457	0.647	0.021	0.134	0.055	1	PVPQSQRPLRPSEAVKVQRSEQLHRWDPCVPSCHSPRPGHCRMPTWATPAGQDQSRSLSSTPFSSPTLNHAFSCNNPSTLPRGSQPMSPRTTMGRRRQRRREHKSSLSLASSTVGPGGQIVHTETTE	nucleotide kinase activity(GO:0019201)	intracellular signal transduction(GO:0035556);neurological system process(GO:0050877);synaptic transmission(GO:0007268)	cell junction(GO:0030054);plasma membrane(GO:0005886)
	P26358	DNA (cytosine-5)-methyltransferase 1	39	1101	1140	0.666	0.116	0.256	0.103	3	NHARSPGNKGKGKGKGKGKPKSQACEPSEPEIEIKLPKL
	P26358	DNA (cytosine-5)-methyltransferase 1	64	692	756	0.511	-0.065	0.219	0.203	3	PNMAMKEADDDEEVDDNIPEMPSPKKMHQGKKKKQNKNRISWVGEAVKTDGKKSYYKKVCIDAE
	P10515	Dihydrolipoyllysine-residue acetyltransferase component of pyruvate dehydrogenase complex, mitochondrial	54	166	220	0.634	-0.052	0.037	0.074	1	TVGKPEDIEAFKNYTLDSSAAPTPQAAPAPTPAATASPPTPSAQAPGSSYPPHM	acetyltransferase activity(GO:0016407)	carbohydrate metabolic process(GO:0005975);coenzyme metabolic process(GO:0006732)
	P10515	Dihydrolipoyllysine-residue acetyltransferase component of pyruvate dehydrogenase complex, mitochondrial	124	294	418	0.57	-0.001	0.105	0.089	1	VEKEADISAFADYRPTEVTDLKPQVPPPTPPPVAAVPPTPQPLAPTPSAPCPATPAGPKGRVFVSPLAKKLAVEKGIDLTQVKGTGPDGRITKKDIDSFVPSKVAPAPAAVVPPTGPGMAPVPT	acetyltransferase activity(GO:0016407)	carbohydrate metabolic process(GO:0005975);coenzyme metabolic process(GO:0006732)
	Q12906	Interleukin enhancer-binding factor 3	60	343	403	0.774	0.207	0.233	0.167	3	MPKKPKNENPVDYTVQIPPSTTYAITPMKRPMEEDGEEKSPSKKKKKIQKKEEKAEPPQA		RNA localization(GO:0006403);anterior/posterior axis specification(GO:0009948);apoptotic process(GO:0006915);neurological system process(GO:0050877);response to interferon-gamma(GO:0034341);spermatogenesis(GO:0007283)
	Q12906	Interleukin enhancer-binding factor 3	61	466	527	0.687	0.034	0.082	0.164	1	GLPTGAEGRDSSKGEDSAEETEAKPAVVAPAPVVEAVSTPSAAFPSDATAEQGPILTKHGK		RNA localization(GO:0006403);anterior/posterior axis specification(GO:0009948);apoptotic process(GO:0006915);neurological system process(GO:0050877);response to interferon-gamma(GO:0034341);spermatogenesis(GO:0007283)
	Q96JN8	Neuralized-like protein 4	34	686	720	0.697	-0.083	0.029	0.147	1	DVEVAPVPEPLPEGNNQVSPSSPSSGAGGSDLRF	ubiquitin-protein ligase activity(GO:0004842)	cellular process(GO:0009987);developmental process(GO:0032502);gamete generation(GO:0007276)
	Q96JN8	Neuralized-like protein 4	114	207	321	0.578	-0.004	0.009	0.123	1	PEPGFSPPTPIPTPPLEPLAPTEDSALAEQGTSADEAFMVSPAQARPETFPNSLESHNDFANMELSEVVSNTILSAYNGGLLNVNLSSPPAGEGLGSSGAATSPILTSNDALLF	ubiquitin-protein ligase activity(GO:0004842)	cellular process(GO:0009987);developmental process(GO:0032502);gamete generation(GO:0007276)
	Q96JN8	Neuralized-like protein 4	49	1086	1135	0.735	0.309	0.02	0.286	2	STRLEESEGTQPPSPSSDTGSEGEEDDEGEEHGLGGQNEVGIIPTTLEF	ubiquitin-protein ligase activity(GO:0004842)	cellular process(GO:0009987);developmental process(GO:0032502);gamete generation(GO:0007276)
	P07814	Bifunctional glutamate/proline--tRNA ligase	26	879	905	0.782	-0.023	0.077	0.154	1	LSQSSDSSPTRNSEPAGLETPEAKVL	RNA binding(GO:0003723);aminoacyl-tRNA ligase activity(GO:0004812)	biosynthetic process(GO:0009058);cellular amino acid metabolic process(GO:0006520);cellular process(GO:0009987);nitrogen compound metabolic process(GO:0006807);tRNA aminoacylation for protein translation(GO:0006418);tRNA metabolic process(GO:0006399)	cytoplasm(GO:0005737)
	P07814	Bifunctional glutamate/proline--tRNA ligase	21	806	827	0.575	-0.276	0.048	0.095	1	AEIGQNISSNSSASILESKSL	RNA binding(GO:0003723);aminoacyl-tRNA ligase activity(GO:0004812)	biosynthetic process(GO:0009058);cellular amino acid metabolic process(GO:0006520);cellular process(GO:0009987);nitrogen compound metabolic process(GO:0006807);tRNA aminoacylation for protein translation(GO:0006418);tRNA metabolic process(GO:0006399)	cytoplasm(GO:0005737)
	P00734	Prothrombin	25	292	317	0.556	0.109	0.08	0.44	4	EEAVEEETGDGLDEDSDRAIEGRTA	serine-type peptidase activity(GO:0008236)	blood coagulation(GO:0007596);proteolysis(GO:0006508)
	P00734	Prothrombin	27	187	214	0.507	-0.156	0.037	0.111	1	GQDQVTVAMTPRSEGSSVNLSPPLEQC	serine-type peptidase activity(GO:0008236)	blood coagulation(GO:0007596);proteolysis(GO:0006508)
	Q9BWE0	Replication initiator 1	61	315	376	0.853	0.105	0.049	0.115	1	KRSEGSAQAAPGPGSPQLPAGPQESAAEPTPAVPLKPAQEPPPGAPPEHPQDPIEAPPSLY
	Q9BWE0	Replication initiator 1	65	200	265	0.509	0.048	0.2	0.092	2	VAEALEEAAAKALGPRPRGRPAVTAPRPGGDAVDRPFQCACCGKRFRHKPNLIAHRRVHTGERPH
	Q9NRF2	SH2B adapter protein 1	189	82	271	0.61	-0.107	0.116	0.085	1	RASGSLSPPILAPLSPGAEISPHDLSLESCRVGGPLAVLGPSRSSEDLAGPLPSSVSSSSTTSSKPKLKKRFSLRSVGRSVRGSVRGILQWRGTVDPPSSAGPLETSSGPPVLGGNSNSNSSGGAGTVGRGLVSDGTSPGERWTHRFERLRLSRGGGALKDGAGMVQREELLSFMGAEEAAPDPAGVGR		B cell mediated immunity(GO:0019724);cellular defense response(GO:0006968);cellular process(GO:0009987)
	Q9NRF2	SH2B adapter protein 1	151	377	528	0.633	0.068	0.033	0.126	1	PGPCPATSPRPMTLPLAPGTSFLTRENTDSLELSCLNHSESLPSQDLLLGPSESNDRLSQGAYGGLSDRPSASISPSSASIAASHFDSMELLPPELPPRIPIEEGPPTGTVHPLSAPYPPLDTPETATGSFLFQGEPEGGEGDQPLSGYPW		B cell mediated immunity(GO:0019724);cellular defense response(GO:0006968);cellular process(GO:0009987)
	Q96MX3	Zinc finger protein 48	30	163	193	0.802	0.223	0.233	0.067	2	SGEKPYRARPPAQGPPKIPRSRIPAGERPT
	Q96MX3	Zinc finger protein 48	70	382	452	0.795	0.232	0.029	0.1	1	MEPQDFSFPGYPLPALIPSPPPPPLGTSPPLTPRSPSHSGEPFGLPGLEPEPGGPQAGEPPPPLAGDKPH
	Q96MX3	Zinc finger protein 48	42	502	544	0.864	0.239	0.167	0.024	1	RGERARPPPPSTLLRPHNPPGPVPMAPRPRVRAQPSGPSQPH
	Q96MX3	Zinc finger protein 48	33	243	276	0.762	0.141	0.212	0.061	2	RGEQPPRPVVPRRQPSRAATAATQGPKAQDKPY
	Q8TER0	Sushi, nidogen and EGF-like domain-containing protein 1	17	1089	1106	0.579	-0.196	0.059	0.059	1	PTESLATAPTHVWTRPL	receptor activity(GO:0004872);receptor binding(GO:0005102)	cell-cell signaling(GO:0007267);developmental process(GO:0032502);immune system process(GO:0002376);regulation of transcription from RNA polymerase II promoter(GO:0006357);signal transduction(GO:0007165)
	Q8TER0	Sushi, nidogen and EGF-like domain-containing protein 1	125	1187	1312	0.689	0.077	0.136	0.104	1	SEPAHLYIITSPRDGADRRWHQGGHHPRVLKNRPPPARLPELRLLNDHSAPETPTQPPRFSELVDGRGRVSARFGGSPSKAATVRSQPTASAQLENMEEAPKRVSLALQLPEHGSKDIGNVPGNC	receptor activity(GO:0004872);receptor binding(GO:0005102)	cell-cell signaling(GO:0007267);developmental process(GO:0032502);immune system process(GO:0002376);regulation of transcription from RNA polymerase II promoter(GO:0006357);signal transduction(GO:0007165)
	Q9P0U4	CXXC-type zinc finger protein 1	192	209	401	0.638	0.001	0.193	0.156	2	QLRARESYKYFPSSLSPVTPSESLPRPRRPLPTQQQPQPSQKLGRIREDEGAVASSTVKEPPEATATPEPLSDEDLPLDPDLYQDFCAGAFDDHGLPWMSDTEESPFLDPALRKRAVKVKHVKRREKKSEKKKEERYKRHRQKQKHKDKWKHPERADAKDPASLPQCLGPGCVRPAQPSSKYCSDDCGMKLA	DNA binding(GO:0003677)	DNA metabolic process(GO:0006259)
	Q9P0U4	CXXC-type zinc finger protein 1	84	77	161	0.771	0.136	0.19	0.131	2	DPKLEIRYRHKKSRERDGNERDSSEPRDEGGGRKRPVPDPDLQRRAGSGTGVGAMLARGSASPHKSSPQPLVATPSQHHQQQQQ	DNA binding(GO:0003677)	DNA metabolic process(GO:0006259)
	Q6S9Z5	Zinc finger protein 474	47	118	165	0.522	-0.156	0.128	0.064	1	QKWHIENSKLPKHLRRPEPSKPQSLSSSGSYSLQATNEAAFQSAQAQ
	Q6S9Z5	Zinc finger protein 474	32	189	221	0.556	0.036	0.188	0.062	2	PKGEGPRAPHSNSSDHLTGLKKACSGTPARPR
	Q6S9Z5	Zinc finger protein 474	39	245	284	0.64	-0.218	0.103	0.103	1	EKWKMENDRLPVELHQPLPQKPQPLPNAQSSQAGPNQAQ
	Q8N680	Zinc finger and BTB domain-containing protein 2	87	277	364	0.58	0.011	0.08	0.195	2	TGVPFTSSQQGESRVPLTLCSNAADLGKDAMEVPEAGMISDSELQHISDSPIIDGQQQSETPPPSDIADIDNLEQADQEREVKRRKY	sequence-specific DNA binding transcription factor activity(GO:0003700)	transcription from RNA polymerase II promoter(GO:0006366)
	Q8N680	Zinc finger and BTB domain-containing protein 2	138	117	255	0.619	-0.062	0.08	0.094	1	GAFSHPDQVFPLASSLYGIQIADHQLRQATKIASAPEKLGRDPRPQTSRISQEQVPEASQLSQLTSNLAQVNRTNMTPSDPLQTSLSPELVSTPVPPPPPGEETNLEASSSDEQPASLTIAHVKPSIMKRNGSFPKYY	sequence-specific DNA binding transcription factor activity(GO:0003700)	transcription from RNA polymerase II promoter(GO:0006366)
	Q569K4	Zinc finger protein 385B	104	182	286	0.664	0.102	0.163	0.096	2	AKKVKALDATKNKPKMVPSKDSAKANPSCSITPITGNNSDKSEDKGKLKASSSSQPSSSESGSFLLKSGTTPLPPGAATSPSKSTNGAPGTVVESEEEKAKKLL	RNA binding(GO:0003723);protein binding(GO:0005515)	apoptotic process(GO:0006915);intracellular signal transduction(GO:0035556);regulation of biological process(GO:0050789);response to stimulus(GO:0050896)	intracellular(GO:0005622);nucleus(GO:0005634)
	Q569K4	Zinc finger protein 385B	39	310	349	0.662	-0.001	0.205	0.026	1	KTMVEARNGAGPIKSYPRPGSRLKMQNGSKGSGLQNKTF	RNA binding(GO:0003723);protein binding(GO:0005515)	apoptotic process(GO:0006915);intracellular signal transduction(GO:0035556);regulation of biological process(GO:0050789);response to stimulus(GO:0050896)	intracellular(GO:0005622);nucleus(GO:0005634)
	Q569K4	Zinc finger protein 385B	99	59	158	0.552	-0.309	0.101	0.04	1	RKRVKQLSDGQPPPPAQASPSSNSSTGSTCHTTTLPALVRTPTLMMQPSLDIKPFMSFPVDSSSAVGLFPNFNTMDPVQKAVINHTFGVSIPPKKKQVI	RNA binding(GO:0003723);protein binding(GO:0005515)	apoptotic process(GO:0006915);intracellular signal transduction(GO:0035556);regulation of biological process(GO:0050789);response to stimulus(GO:0050896)	intracellular(GO:0005622);nucleus(GO:0005634)
	Q8NBS9	Thioredoxin domain-containing protein 5	23	168	191	0.631	0.123	0.043	0.261	2	LNEEPVTPEPEVEPPSAPELKQG	protein disulfide isomerase activity(GO:0003756)	cellular component organization(GO:0016043);cellular process(GO:0009987);phagocytosis(GO:0006909);response to stress(GO:0006950)
	Q8NBS9	Thioredoxin domain-containing protein 5	30	294	324	0.53	-0.045	0.067	0.2	2	LQRTETGATETVTPSEAPVLAAEPEADKGT	protein disulfide isomerase activity(GO:0003756)	cellular component organization(GO:0016043);cellular process(GO:0009987);phagocytosis(GO:0006909);response to stress(GO:0006950)
	P08519	Apolipoprotein(a)	37	3974	4011	0.602	-0.046	0.027	0.135	1	PVTESSVLTTPTVAPVPSTEAPSEQAPPEKSPVVQDC	serine-type peptidase activity(GO:0008236)	proteolysis(GO:0006508)	extracellular region(GO:0005576)
	P08519	Apolipoprotein(a)	37	106	143	0.641	0.124	0.027	0.162	1	SDAEGTAVAPPTVTPVPSLEAPSEQAPTEQRPGVQEC	serine-type peptidase activity(GO:0008236)	proteolysis(GO:0006508)	extracellular region(GO:0005576)
	P08519	Apolipoprotein(a)	37	220	257	0.644	0.124	0.027	0.162	1	SDAEGTAVAPPTVTPVPSLEAPSEQAPTEQRPGVQEC	serine-type peptidase activity(GO:0008236)	proteolysis(GO:0006508)	extracellular region(GO:0005576)
	P08519	Apolipoprotein(a)	37	334	371	0.644	0.124	0.027	0.162	1	SDAEGTAVAPPTVTPVPSLEAPSEQAPTEQRPGVQEC	serine-type peptidase activity(GO:0008236)	proteolysis(GO:0006508)	extracellular region(GO:0005576)
	P08519	Apolipoprotein(a)	37	448	485	0.644	0.124	0.027	0.162	1	SDAEGTAVAPPTVTPVPSLEAPSEQAPTEQRPGVQEC	serine-type peptidase activity(GO:0008236)	proteolysis(GO:0006508)	extracellular region(GO:0005576)
	P08519	Apolipoprotein(a)	37	562	599	0.644	0.124	0.027	0.162	1	SDAEGTAVAPPTVTPVPSLEAPSEQAPTEQRPGVQEC	serine-type peptidase activity(GO:0008236)	proteolysis(GO:0006508)	extracellular region(GO:0005576)
	P08519	Apolipoprotein(a)	37	676	713	0.644	0.124	0.027	0.162	1	SDAEGTAVAPPTVTPVPSLEAPSEQAPTEQRPGVQEC	serine-type peptidase activity(GO:0008236)	proteolysis(GO:0006508)	extracellular region(GO:0005576)
	P08519	Apolipoprotein(a)	37	790	827	0.644	0.124	0.027	0.162	1	SDAEGTAVAPPTVTPVPSLEAPSEQAPTEQRPGVQEC	serine-type peptidase activity(GO:0008236)	proteolysis(GO:0006508)	extracellular region(GO:0005576)
	P08519	Apolipoprotein(a)	37	904	941	0.644	0.124	0.027	0.162	1	SDAEGTAVAPPTVTPVPSLEAPSEQAPTEQRPGVQEC	serine-type peptidase activity(GO:0008236)	proteolysis(GO:0006508)	extracellular region(GO:0005576)
	P08519	Apolipoprotein(a)	37	1018	1055	0.644	0.124	0.027	0.162	1	SDAEGTAVAPPTVTPVPSLEAPSEQAPTEQRPGVQEC	serine-type peptidase activity(GO:0008236)	proteolysis(GO:0006508)	extracellular region(GO:0005576)
	P08519	Apolipoprotein(a)	37	1132	1169	0.644	0.124	0.027	0.162	1	SDAEGTAVAPPTVTPVPSLEAPSEQAPTEQRPGVQEC	serine-type peptidase activity(GO:0008236)	proteolysis(GO:0006508)	extracellular region(GO:0005576)
	P08519	Apolipoprotein(a)	37	1246	1283	0.644	0.124	0.027	0.162	1	SDAEGTAVAPPTVTPVPSLEAPSEQAPTEQRPGVQEC	serine-type peptidase activity(GO:0008236)	proteolysis(GO:0006508)	extracellular region(GO:0005576)
	P08519	Apolipoprotein(a)	37	1360	1397	0.644	0.124	0.027	0.162	1	SDAEGTAVAPPTVTPVPSLEAPSEQAPTEQRPGVQEC	serine-type peptidase activity(GO:0008236)	proteolysis(GO:0006508)	extracellular region(GO:0005576)
	P08519	Apolipoprotein(a)	37	1474	1511	0.644	0.124	0.027	0.162	1	SDAEGTAVAPPTVTPVPSLEAPSEQAPTEQRPGVQEC	serine-type peptidase activity(GO:0008236)	proteolysis(GO:0006508)	extracellular region(GO:0005576)
	P08519	Apolipoprotein(a)	37	1588	1625	0.644	0.124	0.027	0.162	1	SDAEGTAVAPPTVTPVPSLEAPSEQAPTEQRPGVQEC	serine-type peptidase activity(GO:0008236)	proteolysis(GO:0006508)	extracellular region(GO:0005576)
	P08519	Apolipoprotein(a)	37	1702	1739	0.644	0.124	0.027	0.162	1	SDAEGTAVAPPTVTPVPSLEAPSEQAPTEQRPGVQEC	serine-type peptidase activity(GO:0008236)	proteolysis(GO:0006508)	extracellular region(GO:0005576)
	P08519	Apolipoprotein(a)	37	1816	1853	0.644	0.124	0.027	0.162	1	SDAEGTAVAPPTVTPVPSLEAPSEQAPTEQRPGVQEC	serine-type peptidase activity(GO:0008236)	proteolysis(GO:0006508)	extracellular region(GO:0005576)
	P08519	Apolipoprotein(a)	37	1930	1967	0.644	0.124	0.027	0.162	1	SDAEGTAVAPPTVTPVPSLEAPSEQAPTEQRPGVQEC	serine-type peptidase activity(GO:0008236)	proteolysis(GO:0006508)	extracellular region(GO:0005576)
	P08519	Apolipoprotein(a)	37	2044	2081	0.644	0.124	0.027	0.162	1	SDAEGTAVAPPTVTPVPSLEAPSEQAPTEQRPGVQEC	serine-type peptidase activity(GO:0008236)	proteolysis(GO:0006508)	extracellular region(GO:0005576)
	P08519	Apolipoprotein(a)	37	2158	2195	0.644	0.124	0.027	0.162	1	SDAEGTAVAPPTVTPVPSLEAPSEQAPTEQRPGVQEC	serine-type peptidase activity(GO:0008236)	proteolysis(GO:0006508)	extracellular region(GO:0005576)
	P08519	Apolipoprotein(a)	37	2272	2309	0.644	0.124	0.027	0.162	1	SDAEGTAVAPPTVTPVPSLEAPSEQAPTEQRPGVQEC	serine-type peptidase activity(GO:0008236)	proteolysis(GO:0006508)	extracellular region(GO:0005576)
	P08519	Apolipoprotein(a)	37	2386	2423	0.644	0.124	0.027	0.162	1	SDAEGTAVAPPTVTPVPSLEAPSEQAPTEQRPGVQEC	serine-type peptidase activity(GO:0008236)	proteolysis(GO:0006508)	extracellular region(GO:0005576)
	P08519	Apolipoprotein(a)	37	2500	2537	0.644	0.124	0.027	0.162	1	SDAEGTAVAPPTVTPVPSLEAPSEQAPTEQRPGVQEC	serine-type peptidase activity(GO:0008236)	proteolysis(GO:0006508)	extracellular region(GO:0005576)
	P08519	Apolipoprotein(a)	37	2614	2651	0.644	0.124	0.027	0.162	1	SDAEGTAVAPPTVTPVPSLEAPSEQAPTEQRPGVQEC	serine-type peptidase activity(GO:0008236)	proteolysis(GO:0006508)	extracellular region(GO:0005576)
	P08519	Apolipoprotein(a)	37	2728	2765	0.644	0.124	0.027	0.162	1	SDAEGTAVAPPTVTPVPSLEAPSEQAPTEQRPGVQEC	serine-type peptidase activity(GO:0008236)	proteolysis(GO:0006508)	extracellular region(GO:0005576)
	P08519	Apolipoprotein(a)	37	2842	2879	0.644	0.124	0.027	0.162	1	SDAEGTAVAPPTVTPVPSLEAPSEQAPTEQRPGVQEC	serine-type peptidase activity(GO:0008236)	proteolysis(GO:0006508)	extracellular region(GO:0005576)
	P08519	Apolipoprotein(a)	37	2956	2993	0.644	0.124	0.027	0.162	1	SDAEGTAVAPPTVTPVPSLEAPSEQAPTEQRPGVQEC	serine-type peptidase activity(GO:0008236)	proteolysis(GO:0006508)	extracellular region(GO:0005576)
	P08519	Apolipoprotein(a)	37	3070	3107	0.644	0.124	0.027	0.162	1	SDAEGTAVAPPTVTPVPSLEAPSEQAPTEQRPGVQEC	serine-type peptidase activity(GO:0008236)	proteolysis(GO:0006508)	extracellular region(GO:0005576)
	P08519	Apolipoprotein(a)	37	3184	3221	0.644	0.124	0.027	0.162	1	SDAEGTAVAPPTVTPVPSLEAPSEQAPTEQRPGVQEC	serine-type peptidase activity(GO:0008236)	proteolysis(GO:0006508)	extracellular region(GO:0005576)
	P08519	Apolipoprotein(a)	37	3298	3335	0.647	0.124	0.027	0.162	1	SDAEGTAVAPPTVTPVPSLEAPSEQAPTEQRPGVQEC	serine-type peptidase activity(GO:0008236)	proteolysis(GO:0006508)	extracellular region(GO:0005576)
	P08519	Apolipoprotein(a)	37	3640	3677	0.557	-0.157	0	0.189	1	LVTESSVLATLTVVPDPSTEASSEEAPTEQSPGVQDC	serine-type peptidase activity(GO:0008236)	proteolysis(GO:0006508)	extracellular region(GO:0005576)
	P08519	Apolipoprotein(a)	37	4088	4125	0.586	-0.102	0.027	0.162	1	SETESGVLETPTVVPVPSMEAHSEAAPTEQTPVVRQC	serine-type peptidase activity(GO:0008236)	proteolysis(GO:0006508)	extracellular region(GO:0005576)
	P08519	Apolipoprotein(a)	29	3754	3783	0.518	-0.163	0	0.138	1	PVTESSVLATSTAVSEQAPTEQSPTVQDC	serine-type peptidase activity(GO:0008236)	proteolysis(GO:0006508)	extracellular region(GO:0005576)
	P08519	Apolipoprotein(a)	37	3412	3449	0.595	0.09	0.027	0.162	1	SDAEGTAVAPPTITPIPSLEAPSEQAPTEQRPGVQEC	serine-type peptidase activity(GO:0008236)	proteolysis(GO:0006508)	extracellular region(GO:0005576)
	P08519	Apolipoprotein(a)	37	3860	3897	0.561	-0.083	0	0.162	1	PVMESTLLTTPTVVPVPSTELPSEEAPTENSTGVQDC	serine-type peptidase activity(GO:0008236)	proteolysis(GO:0006508)	extracellular region(GO:0005576)
	Q8NAF0	Zinc finger protein 579	176	95	271	0.655	0.136	0.102	0.182	2	GPQPPLRCAACPRTFPEPAQLRRHLAQEHAGGEVELAIERVAKETAEPSWGPQDEGSEPPTTAAAGATEEEAVAAWPETWPAGEPSTLAAPTSAAEPRESESEEAEAGAAELRAELALAAGRQEEKQVLLQADWTLLCLRCREAFATKGELKAHPCLRPEGEQEGEGGPPPRPKRH	sequence-specific DNA binding transcription factor activity(GO:0003700)	regulation of transcription from RNA polymerase II promoter(GO:0006357)
	Q8NAF0	Zinc finger protein 579	64	321	385	0.686	0.177	0.109	0.141	2	GPLSLLAPLPAAGKKDDKASGARNSAKGPEGGEGAECGGASEGGEGQNGGDAAPARPPAGEPRF	sequence-specific DNA binding transcription factor activity(GO:0003700)	regulation of transcription from RNA polymerase II promoter(GO:0006357)
	Q9H4F8	SPARC-related modular calcium-binding protein 1	21	293	314	0.597	0.027	0.19	0.333	3	ESDARAKTTEADDPFKDRELP	calcium ion binding(GO:0005509)
	Q9H4F8	SPARC-related modular calcium-binding protein 1	69	159	228	0.568	-0.045	0.13	0.13	2	SGSVTDKPLSQGNSGRKDDGSKPTPTMETQPVFDGDEITAPTLWIKHLVIKDSKLNNTNIRNSEKVYSC	calcium ion binding(GO:0005509)
	Q00987	E3 ubiquitin-protein ligase Mdm2	106	329	435	0.574	0.459	0.113	0.274	3	WLPEDKGKDKGEISEKAKLENSTQAEEGFDVPDCKKTIVNDSRESCVEENDDKITQASQSQESEDYSQPSTSSSIIYSSQEDVKEFEREETQDKEESVESSLPLNA	chromatin binding(GO:0003682);nucleic acid binding(GO:0003676);ubiquitin-protein ligase activity(GO:0004842)	cellular process(GO:0009987);nucleobase-containing compound metabolic process(GO:0006139)
	Q00987	E3 ubiquitin-protein ligase Mdm2	198	102	300	0.575	0.532	0.076	0.247	2	MIYRNLVVVNQQESSDSGTSVSENRCHLEGGSDQKDLVQELQEEKPSSSHLVSRPSTSSRRRAISETEENSDELSGERQRKRHKSDSISLSFDESLALCVIREICCERSSSSESTGTPSNPDLDAGVSEHSGDWLDQDSVSDQFSVEFEVESLDSEDYSLSEEGQELSDEDDEVYQVTVYQAGESDTDSFEEDPEISL	chromatin binding(GO:0003682);nucleic acid binding(GO:0003676);ubiquitin-protein ligase activity(GO:0004842)	cellular process(GO:0009987);nucleobase-containing compound metabolic process(GO:0006139)
	P54764	Ephrin type-A receptor 4	30	879	909	0.539	-0.029	0.167	0.1	2	DKLIRNPNSLKRTGTESSRPNTALLDPSSP		nervous system development(GO:0007399)
	P54764	Ephrin type-A receptor 4	18	425	443	0.518	-0.18	0	0.056	1	NPDQSVSVTVTTNQAAPS		nervous system development(GO:0007399)
	A5YKK6	CCR4-NOT transcription complex subunit 1	156	657	813	0.547	-0.28	0.045	0.032	1	ACAGSVSQELSETILTMVANCSNVMNKARQPPPGVMPKGRPPSASSLDAISPVQIDPLAGMTSLSIGGSAAPHTQSMQGFPPNLGSAFSTPQSPAKAFPPLSTPNQTTAFSGIGGLSSQLPVGGLGTGSLTGIGTGALGLPAVNNDPFVQRKLGTS	protein binding(GO:0005515);structural molecule activity(GO:0005198)	RNA catabolic process(GO:0006401);biosynthetic process(GO:0009058);catabolic process(GO:0009056);cellular process(GO:0009987);nitrogen compound metabolic process(GO:0006807);regulation of translation(GO:0006417)	cytoplasm(GO:0005737);organelle(GO:0043226);protein complex(GO:0043234);ribonucleoprotein complex(GO:0030529)
	A5YKK6	CCR4-NOT transcription complex subunit 1	74	1314	1388	0.504	-0.242	0.041	0.068	1	EQLSAPKKDVKQPEELPPITTTTTSTTPATNTTCTATVPPQPQYSYHDINVYSLAGLAPHITLNPTIPLFQAHP	protein binding(GO:0005515);structural molecule activity(GO:0005198)	RNA catabolic process(GO:0006401);biosynthetic process(GO:0009058);catabolic process(GO:0009056);cellular process(GO:0009987);nitrogen compound metabolic process(GO:0006807);regulation of translation(GO:0006417)	cytoplasm(GO:0005737);organelle(GO:0043226);protein complex(GO:0043234);ribonucleoprotein complex(GO:0030529)
	Q15554	Telomeric repeat-binding factor 2	131	359	490	0.796	0.011	0.13	0.168	2	TQALPASPALKNKRPRKDENESSAPADGEGGSELQPKNKRMTISRLVLEEDSQSTEPSAGLNSSQEAASAPPSKPTVLNQPLPGEKNPKVPKGKWNSSNGVEEKETWVEEDELFQVQAAPDEDSTTNITKK	double-stranded DNA binding(GO:0003690)	DNA metabolic process(GO:0006259);cellular process(GO:0009987);homeostatic process(GO:0042592);nitrogen compound metabolic process(GO:0006807);organelle organization(GO:0006996)	intracellular(GO:0005622);nuclear chromosome(GO:0000228);nucleus(GO:0005634);protein-DNA complex(GO:0032993)
	Q15554	Telomeric repeat-binding factor 2	25	294	319	0.924	0.136	0.2	0.16	3	STGKEDKQPAPGPVEKPPREPARQL	double-stranded DNA binding(GO:0003690)	DNA metabolic process(GO:0006259);cellular process(GO:0009987);homeostatic process(GO:0042592);nitrogen compound metabolic process(GO:0006807);organelle organization(GO:0006996)	intracellular(GO:0005622);nuclear chromosome(GO:0000228);nucleus(GO:0005634);protein-DNA complex(GO:0032993)
	Q8N448	Ligand of Numb protein X 2	49	420	469	0.732	-0.118	0.122	0.061	1	RPGKPQPGNTIREAGNHSSSSQHHTPPPYYSRPSSHKDLTQCVTCQEKH		cellular process(GO:0009987)
	Q8N448	Ligand of Numb protein X 2	24	316	340	0.583	-0.018	0.208	0.167	3	RERRFGNRAHNHSDSNSPREEIFQ		cellular process(GO:0009987)
	Q9UL36	Zinc finger protein 236	123	1046	1169	0.522	0.143	0.154	0.195	2	MSMKPYKCPFCEEGFRTTVHCKKHMKRHQTVPSAVSATGETEGGDICMEEEEEHSDRNASRKSRPEVITFTEEETAQLAKIRPQESATVSEKVLVQSAAEKDRISELRDKQAELQDEPKHANC	sequence-specific DNA binding transcription factor activity(GO:0003700)	regulation of transcription from RNA polymerase II promoter(GO:0006357)
	Q9UL36	Zinc finger protein 236	172	311	483	0.673	-0.109	0.07	0.128	1	GPQNSTSSTETAHVLTATLFQTLPLQQTEAQATSASSQPSSQAVSDVIQQLLELSEPAPVESGQSPQPGQQLSITVGINQDILQQALENSGLSSIPAAAHPNDSCHAKTSAPHAQNPDVSSVSNEQTDPTDAEQEKEQESPEKLDKKEKKMIKKKSPFLPGSIREENGVRWH	sequence-specific DNA binding transcription factor activity(GO:0003700)	regulation of transcription from RNA polymerase II promoter(GO:0006357)
	Q9P2K8	Eukaryotic translation initiation factor 2-alpha kinase 4	127	663	790	0.774	0.458	0.055	0.244	2	AGPGTPPPDSGPLAKDDRAARGQPASDTDGLDSVEAAAPPPILSSSVEWSTSGERSASARFPATGPGSSDDEDDDEDEHGGVFSQSFLPASDSESDIIFDNEDENSKSQNQDEDCNEKNGCHESEPS	protein kinase activity(GO:0004672)	mitosis(GO:0007067);response to stress(GO:0006950);translation(GO:0006412)
	Q9P2K8	Eukaryotic translation initiation factor 2-alpha kinase 4	191	135	326	0.529	0.16	0.173	0.162	2	SEHNKPPPKSFHEEMLERRAQEEQQRLLEAKRKEEQEQREILHEIQRRKEEIKEEKKRKEMAKQERLEIASLSNQDHTSKKDPGGHRTAAILHGGSPDFVGNGKHRANSSGRSRRERQYSVCNSEDSPGSCEILYFNMGSPDQLMVHKGKCIGSDEQLGKLVYNALETATGGFVLLYEWVLQWQKKMGPFL	protein kinase activity(GO:0004672)	mitosis(GO:0007067);response to stress(GO:0006950);translation(GO:0006412)
	Q96QT6	PHD finger protein 12	97	106	203	0.686	-0.135	0.165	0.206	3	RKKREQKKELGHVNGLVDKSGKRTTSPSSDTDLLDRSASKTELKAIAHARILERRASRPGTPTSSASTETPTSEQNDVDEDIIDVDEEPVAAEPDYV	DNA binding(GO:0003677);chromatin binding(GO:0003682);transcription cofactor activity(GO:0003712)	biosynthetic process(GO:0009058);cellular process(GO:0009987);nitrogen compound metabolic process(GO:0006807);regulation of nucleobase-containing compound metabolic process(GO:0019219);transcription, DNA-dependent(GO:0006351)	intracellular(GO:0005622);nucleus(GO:0005634)
	Q96QT6	PHD finger protein 12	32	242	274	0.556	0.132	0.281	0.125	3	KRRRKEETTGKNVKKTQHELDHNGLVPLPVKV	DNA binding(GO:0003677);chromatin binding(GO:0003682);transcription cofactor activity(GO:0003712)	biosynthetic process(GO:0009058);cellular process(GO:0009987);nitrogen compound metabolic process(GO:0006807);regulation of nucleobase-containing compound metabolic process(GO:0019219);transcription, DNA-dependent(GO:0006351)	intracellular(GO:0005622);nucleus(GO:0005634)
	Q9UKY1	Zinc fingers and homeoboxes protein 1	52	522	574	0.614	-0.33	0.077	0.115	1	SKSNQCLHLNNDSSTTIIIDSSDETTESPTVGTAQPKQSWNPFPDFTPQKFK	sequence-specific DNA binding transcription factor activity(GO:0003700);transcription cofactor activity(GO:0003712)	biosynthetic process(GO:0009058);cellular process(GO:0009987);nitrogen compound metabolic process(GO:0006807);regulation of transcription from RNA polymerase II promoter(GO:0006357)	intracellular(GO:0005622);nucleus(GO:0005634)
	Q9UKY1	Zinc fingers and homeoboxes protein 1	42	624	666	0.744	0.097	0.119	0.238	3	ALKEEKMEIDESNAGSSKEEAGETSPADESGAPKSGSTGKIC	sequence-specific DNA binding transcription factor activity(GO:0003700);transcription cofactor activity(GO:0003712)	biosynthetic process(GO:0009058);cellular process(GO:0009987);nitrogen compound metabolic process(GO:0006807);regulation of transcription from RNA polymerase II promoter(GO:0006357)	intracellular(GO:0005622);nucleus(GO:0005634)
	O94875	Sorbin and SH3 domain-containing protein 2	30	915	945	0.707	0.122	0.1	0.133	1	SYVEKLTPPEKAQPARPPPPAQPGEIGEAI
	O94875	Sorbin and SH3 domain-containing protein 2	57	992	1049	0.564	-0.143	0.105	0.123	1	SYVEVVKKNTKGAEDYPDPPIPHSYSSDRIHSLSSNKPQRPVFTHENIQGGGEPFQA
	Q9GZU2	Paternally-expressed gene 3 protein	37	1528	1565	0.503	-0.358	0.054	0.135	1	ASMIIFEPANAFGECSGYIERASTSTGGANQADEKYF	sequence-specific DNA binding RNA polymerase II transcription factor activity(GO:0000981)	biosynthetic process(GO:0009058);cellular process(GO:0009987);nitrogen compound metabolic process(GO:0006807)	intracellular(GO:0005622);nucleus(GO:0005634)
	Q9GZU2	Paternally-expressed gene 3 protein	151	1355	1506	0.882	0.937	0.02	0.364	3	LEEEEEDEAAAAAAAAAQEVEANVHVPQVVLRIQGLNVEAAEPEVEAAEPEVEAAEPEVEAAEPNGEAEGPDGEAAEPIGEAGQPNGEAEQPNGDADEPDGAGIEDPEERAEEPEGKAEEPEGDADEPDGVGIEDPEEGEDQEIQVEEPYY	sequence-specific DNA binding RNA polymerase II transcription factor activity(GO:0000981)	biosynthetic process(GO:0009058);cellular process(GO:0009987);nitrogen compound metabolic process(GO:0006807)	intracellular(GO:0005622);nucleus(GO:0005634)
	Q9GZU2	Paternally-expressed gene 3 protein	116	992	1108	0.695	0.256	0.112	0.25	3	DREKPSGSRNYEWSVIRSLAPTDPQTSYAQEQYAKEQARNKCKDFRQFFATSEDLNTNQKIYDQEKSHGEESQGENTDGEETHSEETHGQETIEDPVIQGSDMEDPQKDDPDDKIY	sequence-specific DNA binding RNA polymerase II transcription factor activity(GO:0000981)	biosynthetic process(GO:0009058);cellular process(GO:0009987);nitrogen compound metabolic process(GO:0006807)	intracellular(GO:0005622);nucleus(GO:0005634)
	P19878	Neutrophil cytosol factor 2	34	430	464	0.665	0.072	0.118	0.235	3	VGDQGFPDEPKESEKADANNQTTEPQLKKGSQVE	oxidoreductase activity(GO:0016491)	immune response(GO:0006955)
	P19878	Neutrophil cytosol factor 2	60	292	352	0.736	0.106	0.117	0.133	2	NYLEPVELRIHPQQQPQEESSPQSDIPAPPSSKAPGRPQLSPGQKQKEEPKEVKLSVPMP	oxidoreductase activity(GO:0016491)	immune response(GO:0006955)
	Q86UL8	Membrane-associated guanylate kinase, WW and PDZ domain-containing protein 2	113	192	305	0.844	0.339	0.097	0.221	2	PAPLLLNVTDQILPGATPSAEGKRKRNKSVSNMEKASIEPPEEEEEERPVVNGNGVVVTPESSEHEDKSAGASGEMPSQPYPAPVYSQPEELKEQMDDTKPTKPEDNEEPDPL	nucleotide kinase activity(GO:0019201)	intracellular signal transduction(GO:0035556);neurological system process(GO:0050877);synaptic transmission(GO:0007268)	cell junction(GO:0030054);plasma membrane(GO:0005886)
	Q86UL8	Membrane-associated guanylate kinase, WW and PDZ domain-containing protein 2	93	334	427	0.515	-0.053	0.172	0.14	2	RLAKKAKPPEECKENELPYGWEKIDDPIYGTYYVDHINRRTQFENPVLEAKRKLQQHNMPHTELGTKPLQAPGFREKPLFTRDASQLKGTFLS	nucleotide kinase activity(GO:0019201)	intracellular signal transduction(GO:0035556);neurological system process(GO:0050877);synaptic transmission(GO:0007268)	cell junction(GO:0030054);plasma membrane(GO:0005886)
	Q86UL8	Membrane-associated guanylate kinase, WW and PDZ domain-containing protein 2	140	1008	1148	0.811	0.219	0.086	0.114	1	PQEELNSPTSAPSSEKQSPMAQQSPLAQQSPLAQPSPATPNSPIAQPAPPQPLQLQGHENSYRSEVKARQDVKPDIRQPPFTDYRQPPLDYRQPPGGDYQQPPPLDYRQPPLLDYRQHSPDTRQYPLSDYRQPQDFDYFT	nucleotide kinase activity(GO:0019201)	intracellular signal transduction(GO:0035556);neurological system process(GO:0050877);synaptic transmission(GO:0007268)	cell junction(GO:0030054);plasma membrane(GO:0005886)
	Q86UL8	Membrane-associated guanylate kinase, WW and PDZ domain-containing protein 2	61	860	921	0.681	-0.217	0.066	0.082	1	RKVLCGGEPCPENGRSPGSVSTHHSSPRSDYATYTNSNHAAPSSNASPPEGFASHSLQTSD	nucleotide kinase activity(GO:0019201)	intracellular signal transduction(GO:0035556);neurological system process(GO:0050877);synaptic transmission(GO:0007268)	cell junction(GO:0030054);plasma membrane(GO:0005886)
	Q9NX65	Zinc finger and SCAN domain-containing protein 32	131	123	254	0.587	-0.089	0.115	0.115	1	VLDSEKDLKVLMKEMAPLGATRESLRSQWKQEVQPEEPTFKGSQSSHQRPGEQSEAWLAPQAPRNLPQNTGLHDQETGAVVWTAGSQGPAMRDNRAVSLCQQEWMCPGPAQRALYRGATQRKDSHVSLATG	sequence-specific DNA binding RNA polymerase II transcription factor activity(GO:0000981)	biosynthetic process(GO:0009058);cellular process(GO:0009987);nitrogen compound metabolic process(GO:0006807)	intracellular(GO:0005622);nucleus(GO:0005634)
	Q9NX65	Zinc finger and SCAN domain-containing protein 32	183	339	522	0.55	-0.101	0.142	0.18	2	SGSWASAPPMASDAVPGQEGSDIEAGELNHQNGEPTEVEDGTVDGADRDEKDFRNPGQEVRKLDLPVLFPNRLGFEFKNEIKKENLKWDDSEEVEINKALQRKSRGVYWHSELQKGLESEPTSRRQCRNSPGESEEKTPSQEKMSHQSFCARDKACTHILCGKNCSQSVHSPHKPALKLEKVS	sequence-specific DNA binding RNA polymerase II transcription factor activity(GO:0000981)	biosynthetic process(GO:0009058);cellular process(GO:0009987);nitrogen compound metabolic process(GO:0006807)	intracellular(GO:0005622);nucleus(GO:0005634)
	P17480	Nucleolar transcription factor 1	46	362	408	0.69	-0.014	0.174	0.174	2	LESLPEEEQQRVLGEEKMLNINKKQATSPASKKPAQEGGKGGSEKP
	P17480	Nucleolar transcription factor 1	16	181	197	0.607	-0.061	0.125	0.25	3	EDHPDLIQNAKKSDIP
	P17480	Nucleolar transcription factor 1	31	265	296	0.55	-0.075	0.194	0.194	3	QKHPELNISEEGITKSTLTKAERQLKDKFDG
	Q9UQQ2	SH2B adapter protein 3	57	308	365	0.506	-0.046	0.053	0.123	1	RGLESTEAEMHIPSALEPSTSSSPRGSTDSLNQGASPGGLLDPACQKTDHFLSCYPW		B cell mediated immunity(GO:0019724);cellular defense response(GO:0006968);cellular process(GO:0009987)
	Q9UQQ2	SH2B adapter protein 3	121	81	202	0.69	0.159	0.157	0.107	2	DGRAPGRDYRDTGRGPPAKAEASPEPGPGPAAPGLPKARSSEELAPPRPPGPCSFQHFRRSLRHIFRRRSAGELPAAHTAAAPGTPGEAAETPARPGLAKKFLPWSLAREPPPEALKEAVL		B cell mediated immunity(GO:0019724);cellular defense response(GO:0006968);cellular process(GO:0009987)
	O75970	Multiple PDZ domain protein	58	1805	1863	0.539	-0.256	0.121	0.086	1	RIKAGPFHSERRPSQSSQVSEGSLSSFTFPLSGSSTSESLESSSKKNALASEIQGLRT		cellular process(GO:0009987)
	O75970	Multiple PDZ domain protein	110	1241	1351	0.549	-0.228	0.1	0.127	1	SIINRPRKSPLPSLLHNLYPKYNFSSTNPFADSLQINADKAPSQSESEPEKAPLCSVPPPPPSAFAEMGSDHTQSSASKISQDVDKEDEFGYSWKNIRERYGTLTGELHM		cellular process(GO:0009987)
	O75970	Multiple PDZ domain protein	66	1562	1628	0.599	-0.143	0.061	0.106	1	AENPDSQAVPSAAGAASGEKKNSSQSLMVPQSGSPEPESIRNTSRSSTPAIFASDPATCPIIPGCE		cellular process(GO:0009987)
	O75970	Multiple PDZ domain protein	42	335	377	0.546	-0.166	0.095	0.167	2	RGAIEERTAPTALGITLSSSPTSTPELRVDASTQKGEESETF		cellular process(GO:0009987)

## Sheet: Sheet2
Zinc finger and SCAN domain-containing protein 29	sequence-specific DNA binding RNA polymerase II transcription factor activity(GO:0000981)	biosynthetic process(GO:0009058);cellular process(GO:0009987);nitrogen compound metabolic process(GO:0006807)	intracellular(GO:0005622);nucleus(GO:0005634)
Zinc finger and SCAN domain-containing protein 29	sequence-specific DNA binding RNA polymerase II transcription factor activity(GO:0000981)	biosynthetic process(GO:0009058);cellular process(GO:0009987);nitrogen compound metabolic process(GO:0006807)	intracellular(GO:0005622);nucleus(GO:0005634)
Zinc finger and SCAN domain-containing protein 29	sequence-specific DNA binding RNA polymerase II transcription factor activity(GO:0000981)	biosynthetic process(GO:0009058);cellular process(GO:0009987);nitrogen compound metabolic process(GO:0006807)	intracellular(GO:0005622);nucleus(GO:0005634)
Striated muscle preferentially expressed protein kinase
Striated muscle preferentially expressed protein kinase
Zinc finger protein 385C	RNA binding(GO:0003723);protein binding(GO:0005515)	apoptotic process(GO:0006915);intracellular signal transduction(GO:0035556);regulation of biological process(GO:0050789);response to stimulus(GO:0050896)
Zinc finger protein 385C	RNA binding(GO:0003723);protein binding(GO:0005515)	apoptotic process(GO:0006915);intracellular signal transduction(GO:0035556);regulation of biological process(GO:0050789);response to stimulus(GO:0050896)
Double-stranded RNA-specific adenosine deaminase	DNA binding(GO:0003677);RNA binding(GO:0003723);deaminase activity(GO:0019239);hydrolase activity(GO:0016787);kinase activator activity(GO:0019209);protein binding(GO:0005515)	RNA localization(GO:0006403);cell cycle(GO:0007049);immune response(GO:0006955);protein metabolic process(GO:0019538);purine nucleobase metabolic process(GO:0006144)
Double-stranded RNA-specific adenosine deaminase	DNA binding(GO:0003677);RNA binding(GO:0003723);deaminase activity(GO:0019239);hydrolase activity(GO:0016787);kinase activator activity(GO:0019209);protein binding(GO:0005515)	RNA localization(GO:0006403);cell cycle(GO:0007049);immune response(GO:0006955);protein metabolic process(GO:0019538);purine nucleobase metabolic process(GO:0006144)
Double-stranded RNA-specific adenosine deaminase	DNA binding(GO:0003677);RNA binding(GO:0003723);deaminase activity(GO:0019239);hydrolase activity(GO:0016787);kinase activator activity(GO:0019209);protein binding(GO:0005515)	RNA localization(GO:0006403);cell cycle(GO:0007049);immune response(GO:0006955);protein metabolic process(GO:0019538);purine nucleobase metabolic process(GO:0006144)
Double-stranded RNA-specific adenosine deaminase	DNA binding(GO:0003677);RNA binding(GO:0003723);deaminase activity(GO:0019239);hydrolase activity(GO:0016787);kinase activator activity(GO:0019209);protein binding(GO:0005515)	RNA localization(GO:0006403);cell cycle(GO:0007049);immune response(GO:0006955);protein metabolic process(GO:0019538);purine nucleobase metabolic process(GO:0006144)
Peripheral plasma membrane protein CASK	nucleotide kinase activity(GO:0019201);protein kinase activity(GO:0004672)	asymmetric protein localization(GO:0008105);neurotransmitter secretion(GO:0007269);signal transduction(GO:0007165);synaptic transmission(GO:0007268)	cell junction(GO:0030054);plasma membrane(GO:0005886)
Peripheral plasma membrane protein CASK	nucleotide kinase activity(GO:0019201);protein kinase activity(GO:0004672)	asymmetric protein localization(GO:0008105);neurotransmitter secretion(GO:0007269);signal transduction(GO:0007165);synaptic transmission(GO:0007268)	cell junction(GO:0030054);plasma membrane(GO:0005886)
PHD finger protein 3	sequence-specific DNA binding transcription factor activity(GO:0003700)	transcription elongation from RNA polymerase II promoter(GO:0006368)
PHD finger protein 3	sequence-specific DNA binding transcription factor activity(GO:0003700)	transcription elongation from RNA polymerase II promoter(GO:0006368)
Insulin-like growth factor 2 mRNA-binding protein 3	catalytic activity(GO:0003824);mRNA binding(GO:0003729);protein binding(GO:0005515)	RNA splicing, via transesterification reactions(GO:0000375);induction of apoptosis(GO:0006917);intracellular protein transport(GO:0006886);mRNA splicing, via spliceosome(GO:0000398);neurological system process(GO:0050877);nuclear transport(GO:0051169);protein metabolic process(GO:0019538);signal transduction(GO:0007165);transcription from RNA polymerase II promoter(GO:0006366)	ribonucleoprotein complex(GO:0030529)
Insulin-like growth factor 2 mRNA-binding protein 3	catalytic activity(GO:0003824);mRNA binding(GO:0003729);protein binding(GO:0005515)	RNA splicing, via transesterification reactions(GO:0000375);induction of apoptosis(GO:0006917);intracellular protein transport(GO:0006886);mRNA splicing, via spliceosome(GO:0000398);neurological system process(GO:0050877);nuclear transport(GO:0051169);protein metabolic process(GO:0019538);signal transduction(GO:0007165);transcription from RNA polymerase II promoter(GO:0006366)	ribonucleoprotein complex(GO:0030529)
SH3 and PX domain-containing protein 2B		intracellular signal transduction(GO:0035556)
SH3 and PX domain-containing protein 2B		intracellular signal transduction(GO:0035556)
SH3 and PX domain-containing protein 2B		intracellular signal transduction(GO:0035556)
Zinc finger and SCAN domain-containing protein 20
Zinc finger and SCAN domain-containing protein 20
Zinc finger and SCAN domain-containing protein 20
Myopalladin	actin binding(GO:0003779)	cell differentiation(GO:0030154);cellular component movement(GO:0006928);cytoskeleton organization(GO:0007010);heart development(GO:0007507);localization(GO:0051179);locomotion(GO:0040011);regulation of biological process(GO:0050789);single-multicellular organism process(GO:0044707)	cytoplasm(GO:0005737);organelle(GO:0043226)
Myopalladin	actin binding(GO:0003779)	cell differentiation(GO:0030154);cellular component movement(GO:0006928);cytoskeleton organization(GO:0007010);heart development(GO:0007507);localization(GO:0051179);locomotion(GO:0040011);regulation of biological process(GO:0050789);single-multicellular organism process(GO:0044707)	cytoplasm(GO:0005737);organelle(GO:0043226)
Sex comb on midleg-like protein 2	chromatin binding(GO:0003682);sequence-specific DNA binding transcription factor activity(GO:0003700)	cell cycle(GO:0007049);regulation of transcription from RNA polymerase II promoter(GO:0006357)
Sex comb on midleg-like protein 2	chromatin binding(GO:0003682);sequence-specific DNA binding transcription factor activity(GO:0003700)	cell cycle(GO:0007049);regulation of transcription from RNA polymerase II promoter(GO:0006357)
Zinc finger RNA-binding protein 2	DNA binding(GO:0003677);deaminase activity(GO:0019239);hydrolase activity(GO:0016787);kinase activator activity(GO:0019209);mRNA binding(GO:0003729);protein binding(GO:0005515)	RNA localization(GO:0006403);anterior/posterior axis specification(GO:0009948);apoptotic process(GO:0006915);cell cycle(GO:0007049);mRNA processing(GO:0006397);neurological system process(GO:0050877);nucleobase-containing compound transport(GO:0015931);protein metabolic process(GO:0019538);purine nucleobase metabolic process(GO:0006144);response to interferon-gamma(GO:0034341);spermatogenesis(GO:…
Zinc finger RNA-binding protein 2	DNA binding(GO:0003677);deaminase activity(GO:0019239);hydrolase activity(GO:0016787);kinase activator activity(GO:0019209);mRNA binding(GO:0003729);protein binding(GO:0005515)	RNA localization(GO:0006403);anterior/posterior axis specification(GO:0009948);apoptotic process(GO:0006915);cell cycle(GO:0007049);mRNA processing(GO:0006397);neurological system process(GO:0050877);nucleobase-containing compound transport(GO:0015931);protein metabolic process(GO:0019538);purine nucleobase metabolic process(GO:0006144);response to interferon-gamma(GO:0034341);spermatogenesis(GO:…
Zinc finger RNA-binding protein 2	DNA binding(GO:0003677);deaminase activity(GO:0019239);hydrolase activity(GO:0016787);kinase activator activity(GO:0019209);mRNA binding(GO:0003729);protein binding(GO:0005515)	RNA localization(GO:0006403);anterior/posterior axis specification(GO:0009948);apoptotic process(GO:0006915);cell cycle(GO:0007049);mRNA processing(GO:0006397);neurological system process(GO:0050877);nucleobase-containing compound transport(GO:0015931);protein metabolic process(GO:0019538);purine nucleobase metabolic process(GO:0006144);response to interferon-gamma(GO:0034341);spermatogenesis(GO:…
SH3 domain-containing kinase-binding protein 1	receptor binding(GO:0005102)	nucleobase-containing compound metabolic process(GO:0006139)
SH3 domain-containing kinase-binding protein 1	receptor binding(GO:0005102)	nucleobase-containing compound metabolic process(GO:0006139)
UBX domain-containing protein 7
UBX domain-containing protein 7
Myosin light chain kinase, smooth muscle		cellular component movement(GO:0006928);localization(GO:0051179);locomotion(GO:0040011);muscle contraction(GO:0006936);regulation of biological process(GO:0050789)
Myosin light chain kinase, smooth muscle		cellular component movement(GO:0006928);localization(GO:0051179);locomotion(GO:0040011);muscle contraction(GO:0006936);regulation of biological process(GO:0050789)
Myosin light chain kinase, smooth muscle		cellular component movement(GO:0006928);localization(GO:0051179);locomotion(GO:0040011);muscle contraction(GO:0006936);regulation of biological process(GO:0050789)
InaD-like protein		cellular process(GO:0009987)
InaD-like protein		cellular process(GO:0009987)
Immunoglobulin superfamily DCC subclass member 4
Immunoglobulin superfamily DCC subclass member 4
Protein disulfide-isomerase A5	protein disulfide isomerase activity(GO:0003756)	cellular process(GO:0009987);response to stress(GO:0006950)
Protein disulfide-isomerase A5	protein disulfide isomerase activity(GO:0003756)	cellular process(GO:0009987);response to stress(GO:0006950)
Brother of CDO
Brother of CDO
Zinc finger protein 687	sequence-specific DNA binding transcription factor activity(GO:0003700)	regulation of transcription from RNA polymerase II promoter(GO:0006357)
Zinc finger protein 687	sequence-specific DNA binding transcription factor activity(GO:0003700)	regulation of transcription from RNA polymerase II promoter(GO:0006357)
Rho GTPase-activating protein 10	protein binding(GO:0005515);small GTPase regulator activity(GO:0005083)	cell-cell adhesion(GO:0016337);signal transduction(GO:0007165)
Rho GTPase-activating protein 10	protein binding(GO:0005515);small GTPase regulator activity(GO:0005083)	cell-cell adhesion(GO:0016337);signal transduction(GO:0007165)
NSFL1 cofactor p47	phosphatase regulator activity(GO:0019208);phosphoprotein phosphatase activity(GO:0004721);protein binding(GO:0005515)	catabolic process(GO:0009056);cell communication(GO:0007154);cellular component biogenesis(GO:0044085);organelle organization(GO:0006996);phosphate-containing compound metabolic process(GO:0006796);proteolysis(GO:0006508);regulation of biological process(GO:0050789);response to external stimulus(GO:0009605);response to stress(GO:0006950)	cytosol(GO:0005829);nucleus(GO:0005634)
NSFL1 cofactor p47	phosphatase regulator activity(GO:0019208);phosphoprotein phosphatase activity(GO:0004721);protein binding(GO:0005515)	catabolic process(GO:0009056);cell communication(GO:0007154);cellular component biogenesis(GO:0044085);organelle organization(GO:0006996);phosphate-containing compound metabolic process(GO:0006796);proteolysis(GO:0006508);regulation of biological process(GO:0050789);response to external stimulus(GO:0009605);response to stress(GO:0006950)	cytosol(GO:0005829);nucleus(GO:0005634)
Homeobox protein cut-like 1	sequence-specific DNA binding transcription factor activity(GO:0003700)	regulation of transcription from RNA polymerase II promoter(GO:0006357)
Homeobox protein cut-like 1	sequence-specific DNA binding transcription factor activity(GO:0003700)	regulation of transcription from RNA polymerase II promoter(GO:0006357)
SH3 and PX domain-containing protein 2A		intracellular signal transduction(GO:0035556)
SH3 and PX domain-containing protein 2A		intracellular signal transduction(GO:0035556)
UV excision repair protein RAD23 homolog B	damaged DNA binding(GO:0003684)	DNA repair(GO:0006281)
UV excision repair protein RAD23 homolog B	damaged DNA binding(GO:0003684)	DNA repair(GO:0006281)
UV excision repair protein RAD23 homolog B	damaged DNA binding(GO:0003684)	DNA repair(GO:0006281)
UV excision repair protein RAD23 homolog A	damaged DNA binding(GO:0003684)	DNA repair(GO:0006281)
UV excision repair protein RAD23 homolog A	damaged DNA binding(GO:0003684)	DNA repair(GO:0006281)
UV excision repair protein RAD23 homolog A	damaged DNA binding(GO:0003684)	DNA repair(GO:0006281)
Tight junction protein ZO-2		anatomical structure morphogenesis(GO:0009653);cellular process(GO:0009987)	plasma membrane(GO:0005886)
Tight junction protein ZO-2		anatomical structure morphogenesis(GO:0009653);cellular process(GO:0009987)	plasma membrane(GO:0005886)
Deleted in azoospermia protein 1	RNA binding(GO:0003723)	gamete generation(GO:0007276)
Deleted in azoospermia protein 1	RNA binding(GO:0003723)	gamete generation(GO:0007276)
Tyrosine-protein phosphatase non-receptor type 13	phosphoprotein phosphatase activity(GO:0004721)	cellular protein modification process(GO:0006464)	cytoplasm(GO:0005737)
Tyrosine-protein phosphatase non-receptor type 13	phosphoprotein phosphatase activity(GO:0004721)	cellular protein modification process(GO:0006464)	cytoplasm(GO:0005737)
SPARC-related modular calcium-binding protein 2	calcium ion binding(GO:0005509)
SPARC-related modular calcium-binding protein 2	calcium ion binding(GO:0005509)
PDZ domain-containing protein 2	cytokine receptor binding(GO:0005126)	ectoderm development(GO:0007398);immune response(GO:0006955);nervous system development(GO:0007399);sensory perception(GO:0007600);visual perception(GO:0007601)
PDZ domain-containing protein 2	cytokine receptor binding(GO:0005126)	ectoderm development(GO:0007398);immune response(GO:0006955);nervous system development(GO:0007399);sensory perception(GO:0007600);visual perception(GO:0007601)
DnaJ homolog subfamily C member 2
DnaJ homolog subfamily C member 2
Zinc finger protein 646	sequence-specific DNA binding transcription factor activity(GO:0003700)	regulation of transcription from RNA polymerase II promoter(GO:0006357)
Zinc finger protein 646	sequence-specific DNA binding transcription factor activity(GO:0003700)	regulation of transcription from RNA polymerase II promoter(GO:0006357)
Zinc finger protein 646	sequence-specific DNA binding transcription factor activity(GO:0003700)	regulation of transcription from RNA polymerase II promoter(GO:0006357)
Zinc finger protein 646	sequence-specific DNA binding transcription factor activity(GO:0003700)	regulation of transcription from RNA polymerase II promoter(GO:0006357)
Zinc finger protein 646	sequence-specific DNA binding transcription factor activity(GO:0003700)	regulation of transcription from RNA polymerase II promoter(GO:0006357)
Zinc finger protein 646	sequence-specific DNA binding transcription factor activity(GO:0003700)	regulation of transcription from RNA polymerase II promoter(GO:0006357)
Zinc finger protein 646	sequence-specific DNA binding transcription factor activity(GO:0003700)	regulation of transcription from RNA polymerase II promoter(GO:0006357)
Zinc finger protein 646	sequence-specific DNA binding transcription factor activity(GO:0003700)	regulation of transcription from RNA polymerase II promoter(GO:0006357)
Zinc finger protein 646	sequence-specific DNA binding transcription factor activity(GO:0003700)	regulation of transcription from RNA polymerase II promoter(GO:0006357)
Zinc finger protein 646	sequence-specific DNA binding transcription factor activity(GO:0003700)	regulation of transcription from RNA polymerase II promoter(GO:0006357)
E3 SUMO-protein ligase RanBP2	protein binding(GO:0005515);small GTPase regulator activity(GO:0005083)	nuclear transport(GO:0051169);protein targeting(GO:0006605)
E3 SUMO-protein ligase RanBP2	protein binding(GO:0005515);small GTPase regulator activity(GO:0005083)	nuclear transport(GO:0051169);protein targeting(GO:0006605)
E3 SUMO-protein ligase RanBP2	protein binding(GO:0005515);small GTPase regulator activity(GO:0005083)	nuclear transport(GO:0051169);protein targeting(GO:0006605)
RNA-binding protein 28
RNA-binding protein 28
Ras-responsive element-binding protein 1	sequence-specific DNA binding transcription factor activity(GO:0003700)	biosynthetic process(GO:0009058);developmental process(GO:0032502);nitrogen compound metabolic process(GO:0006807);regulation of nucleobase-containing compound metabolic process(GO:0019219);response to stimulus(GO:0050896);signal transduction(GO:0007165);single-multicellular organism process(GO:0044707);transcription from RNA polymerase II promoter(GO:0006366)	intracellular(GO:0005622);nucleus(GO:0005634)
Ras-responsive element-binding protein 1	sequence-specific DNA binding transcription factor activity(GO:0003700)	biosynthetic process(GO:0009058);developmental process(GO:0032502);nitrogen compound metabolic process(GO:0006807);regulation of nucleobase-containing compound metabolic process(GO:0019219);response to stimulus(GO:0050896);signal transduction(GO:0007165);single-multicellular organism process(GO:0044707);transcription from RNA polymerase II promoter(GO:0006366)	intracellular(GO:0005622);nucleus(GO:0005634)
Zinc finger protein 865	transcription cofactor activity(GO:0003712)	biosynthetic process(GO:0009058);cellular process(GO:0009987);nitrogen compound metabolic process(GO:0006807);regulation of transcription from RNA polymerase II promoter(GO:0006357)	intracellular(GO:0005622);nucleus(GO:0005634)
Zinc finger protein 865	transcription cofactor activity(GO:0003712)	biosynthetic process(GO:0009058);cellular process(GO:0009987);nitrogen compound metabolic process(GO:0006807);regulation of transcription from RNA polymerase II promoter(GO:0006357)	intracellular(GO:0005622);nucleus(GO:0005634)
Protogenin
Protogenin
FLYWCH-type zinc finger-containing protein 1
FLYWCH-type zinc finger-containing protein 1
FLYWCH-type zinc finger-containing protein 1
Zinc finger RNA-binding protein	DNA binding(GO:0003677);deaminase activity(GO:0019239);hydrolase activity(GO:0016787);kinase activator activity(GO:0019209);mRNA binding(GO:0003729);protein binding(GO:0005515)	RNA localization(GO:0006403);anterior/posterior axis specification(GO:0009948);apoptotic process(GO:0006915);cell cycle(GO:0007049);mRNA processing(GO:0006397);neurological system process(GO:0050877);nucleobase-containing compound transport(GO:0015931);protein metabolic process(GO:0019538);purine nucleobase metabolic process(GO:0006144);response to interferon-gamma(GO:0034341);spermatogenesis(GO:…
Zinc finger RNA-binding protein	DNA binding(GO:0003677);deaminase activity(GO:0019239);hydrolase activity(GO:0016787);kinase activator activity(GO:0019209);mRNA binding(GO:0003729);protein binding(GO:0005515)	RNA localization(GO:0006403);anterior/posterior axis specification(GO:0009948);apoptotic process(GO:0006915);cell cycle(GO:0007049);mRNA processing(GO:0006397);neurological system process(GO:0050877);nucleobase-containing compound transport(GO:0015931);protein metabolic process(GO:0019538);purine nucleobase metabolic process(GO:0006144);response to interferon-gamma(GO:0034341);spermatogenesis(GO:…
Zinc finger RNA-binding protein	DNA binding(GO:0003677);deaminase activity(GO:0019239);hydrolase activity(GO:0016787);kinase activator activity(GO:0019209);mRNA binding(GO:0003729);protein binding(GO:0005515)	RNA localization(GO:0006403);anterior/posterior axis specification(GO:0009948);apoptotic process(GO:0006915);cell cycle(GO:0007049);mRNA processing(GO:0006397);neurological system process(GO:0050877);nucleobase-containing compound transport(GO:0015931);protein metabolic process(GO:0019538);purine nucleobase metabolic process(GO:0006144);response to interferon-gamma(GO:0034341);spermatogenesis(GO:…
Membrane-associated guanylate kinase, WW and PDZ domain-containing protein 3	nucleotide kinase activity(GO:0019201)	intracellular signal transduction(GO:0035556);neurological system process(GO:0050877);synaptic transmission(GO:0007268)	cell junction(GO:0030054);plasma membrane(GO:0005886)
Membrane-associated guanylate kinase, WW and PDZ domain-containing protein 3	nucleotide kinase activity(GO:0019201)	intracellular signal transduction(GO:0035556);neurological system process(GO:0050877);synaptic transmission(GO:0007268)	cell junction(GO:0030054);plasma membrane(GO:0005886)
Membrane-associated guanylate kinase, WW and PDZ domain-containing protein 3	nucleotide kinase activity(GO:0019201)	intracellular signal transduction(GO:0035556);neurological system process(GO:0050877);synaptic transmission(GO:0007268)	cell junction(GO:0030054);plasma membrane(GO:0005886)
Zinc finger protein 385A	mRNA binding(GO:0003729);protein binding(GO:0005515)	RNA localization(GO:0006403);apoptotic process(GO:0006915);biosynthetic process(GO:0009058);intracellular signal transduction(GO:0035556);regulation of translation(GO:0006417);response to stimulus(GO:0050896)	neuronal cell body(GO:0043025)
Zinc finger protein 385A	mRNA binding(GO:0003729);protein binding(GO:0005515)	RNA localization(GO:0006403);apoptotic process(GO:0006915);biosynthetic process(GO:0009058);intracellular signal transduction(GO:0035556);regulation of translation(GO:0006417);response to stimulus(GO:0050896)	neuronal cell body(GO:0043025)
E3 ubiquitin-protein ligase SMURF1		biosynthetic process(GO:0009058);catabolic process(GO:0009056);cellular protein modification process(GO:0006464);nitrogen compound metabolic process(GO:0006807);proteolysis(GO:0006508);regulation of transcription from RNA polymerase II promoter(GO:0006357);response to stimulus(GO:0050896);transmembrane receptor protein serine/threonine kinase signaling pathway(GO:0007178)	cytoplasm(GO:0005737)
E3 ubiquitin-protein ligase SMURF1		biosynthetic process(GO:0009058);catabolic process(GO:0009056);cellular protein modification process(GO:0006464);nitrogen compound metabolic process(GO:0006807);proteolysis(GO:0006508);regulation of transcription from RNA polymerase II promoter(GO:0006357);response to stimulus(GO:0050896);transmembrane receptor protein serine/threonine kinase signaling pathway(GO:0007178)	cytoplasm(GO:0005737)
Copper-transporting ATPase 2	ATPase activity, coupled to transmembrane movement of substances(GO:0042626);cation transmembrane transporter activity(GO:0008324);pyrophosphatase activity(GO:0016462)	catabolic process(GO:0009056);cellular process(GO:0009987);nitrogen compound metabolic process(GO:0006807);nucleobase-containing compound metabolic process(GO:0006139);phosphate-containing compound metabolic process(GO:0006796)	cytoplasm(GO:0005737);integral to membrane(GO:0016021);organelle(GO:0043226);plasma membrane(GO:0005886)
Copper-transporting ATPase 2	ATPase activity, coupled to transmembrane movement of substances(GO:0042626);cation transmembrane transporter activity(GO:0008324);pyrophosphatase activity(GO:0016462)	catabolic process(GO:0009056);cellular process(GO:0009987);nitrogen compound metabolic process(GO:0006807);nucleobase-containing compound metabolic process(GO:0006139);phosphate-containing compound metabolic process(GO:0006796)	cytoplasm(GO:0005737);integral to membrane(GO:0016021);organelle(GO:0043226);plasma membrane(GO:0005886)
Cell adhesion molecule-related/down-regulated by oncogenes
Cell adhesion molecule-related/down-regulated by oncogenes
DNA-binding protein SATB1	DNA binding(GO:0003677)	biosynthetic process(GO:0009058);cellular process(GO:0009987);nitrogen compound metabolic process(GO:0006807);regulation of transcription from RNA polymerase II promoter(GO:0006357)	intracellular(GO:0005622);nucleus(GO:0005634)
DNA-binding protein SATB1	DNA binding(GO:0003677)	biosynthetic process(GO:0009058);cellular process(GO:0009987);nitrogen compound metabolic process(GO:0006807);regulation of transcription from RNA polymerase II promoter(GO:0006357)	intracellular(GO:0005622);nucleus(GO:0005634)
DNA-binding protein SATB1	DNA binding(GO:0003677)	biosynthetic process(GO:0009058);cellular process(GO:0009987);nitrogen compound metabolic process(GO:0006807);regulation of transcription from RNA polymerase II promoter(GO:0006357)	intracellular(GO:0005622);nucleus(GO:0005634)
DNA-binding protein SATB2	DNA binding(GO:0003677)	biosynthetic process(GO:0009058);cellular process(GO:0009987);nitrogen compound metabolic process(GO:0006807);regulation of transcription from RNA polymerase II promoter(GO:0006357)	intracellular(GO:0005622);nucleus(GO:0005634)
DNA-binding protein SATB2	DNA binding(GO:0003677)	biosynthetic process(GO:0009058);cellular process(GO:0009987);nitrogen compound metabolic process(GO:0006807);regulation of transcription from RNA polymerase II promoter(GO:0006357)	intracellular(GO:0005622);nucleus(GO:0005634)
Protein scribble homolog	nucleotide kinase activity(GO:0019201);receptor binding(GO:0005102)	cellular component organization(GO:0016043);nervous system development(GO:0007399);neurological system process(GO:0050877);nitrogen compound metabolic process(GO:0006807);nucleobase-containing compound metabolic process(GO:0006139);phosphate-containing compound metabolic process(GO:0006796);protein localization(GO:0008104);synaptic transmission(GO:0007268)	cell projection(GO:0042995);cytoskeleton(GO:0005856);integral to membrane(GO:0016021);intracellular(GO:0005622);plasma membrane(GO:0005886);postsynaptic membrane(GO:0045211);protein complex(GO:0043234)
Protein scribble homolog	nucleotide kinase activity(GO:0019201);receptor binding(GO:0005102)	cellular component organization(GO:0016043);nervous system development(GO:0007399);neurological system process(GO:0050877);nitrogen compound metabolic process(GO:0006807);nucleobase-containing compound metabolic process(GO:0006139);phosphate-containing compound metabolic process(GO:0006796);protein localization(GO:0008104);synaptic transmission(GO:0007268)	cell projection(GO:0042995);cytoskeleton(GO:0005856);integral to membrane(GO:0016021);intracellular(GO:0005622);plasma membrane(GO:0005886);postsynaptic membrane(GO:0045211);protein complex(GO:0043234)
Zinc finger protein 219	sequence-specific DNA binding RNA polymerase II transcription factor activity(GO:0000981)	biosynthetic process(GO:0009058);developmental process(GO:0032502);nitrogen compound metabolic process(GO:0006807);response to stimulus(GO:0050896);signal transduction(GO:0007165);single-multicellular organism process(GO:0044707)	intracellular(GO:0005622);nucleus(GO:0005634)
Zinc finger protein 219	sequence-specific DNA binding RNA polymerase II transcription factor activity(GO:0000981)	biosynthetic process(GO:0009058);developmental process(GO:0032502);nitrogen compound metabolic process(GO:0006807);response to stimulus(GO:0050896);signal transduction(GO:0007165);single-multicellular organism process(GO:0044707)	intracellular(GO:0005622);nucleus(GO:0005634)
Insulinoma-associated protein 1		regulation of transcription from RNA polymerase II promoter(GO:0006357)
Insulinoma-associated protein 1		regulation of transcription from RNA polymerase II promoter(GO:0006357)
Deleted in malignant brain tumors 1 protein	oxidoreductase activity(GO:0016491);receptor activity(GO:0004872);serine-type peptidase activity(GO:0008236)	cell-cell adhesion(GO:0016337);extracellular transport(GO:0006858);macrophage activation(GO:0042116);negative regulation of apoptotic process(GO:0043066);neurological system process(GO:0050877);proteolysis(GO:0006508);signal transduction(GO:0007165)
Deleted in malignant brain tumors 1 protein	oxidoreductase activity(GO:0016491);receptor activity(GO:0004872);serine-type peptidase activity(GO:0008236)	cell-cell adhesion(GO:0016337);extracellular transport(GO:0006858);macrophage activation(GO:0042116);negative regulation of apoptotic process(GO:0043066);neurological system process(GO:0050877);proteolysis(GO:0006508);signal transduction(GO:0007165)
Deleted in malignant brain tumors 1 protein	oxidoreductase activity(GO:0016491);receptor activity(GO:0004872);serine-type peptidase activity(GO:0008236)	cell-cell adhesion(GO:0016337);extracellular transport(GO:0006858);macrophage activation(GO:0042116);negative regulation of apoptotic process(GO:0043066);neurological system process(GO:0050877);proteolysis(GO:0006508);signal transduction(GO:0007165)
Deleted in malignant brain tumors 1 protein	oxidoreductase activity(GO:0016491);receptor activity(GO:0004872);serine-type peptidase activity(GO:0008236)	cell-cell adhesion(GO:0016337);extracellular transport(GO:0006858);macrophage activation(GO:0042116);negative regulation of apoptotic process(GO:0043066);neurological system process(GO:0050877);proteolysis(GO:0006508);signal transduction(GO:0007165)
Deleted in malignant brain tumors 1 protein	oxidoreductase activity(GO:0016491);receptor activity(GO:0004872);serine-type peptidase activity(GO:0008236)	cell-cell adhesion(GO:0016337);extracellular transport(GO:0006858);macrophage activation(GO:0042116);negative regulation of apoptotic process(GO:0043066);neurological system process(GO:0050877);proteolysis(GO:0006508);signal transduction(GO:0007165)
Deleted in malignant brain tumors 1 protein	oxidoreductase activity(GO:0016491);receptor activity(GO:0004872);serine-type peptidase activity(GO:0008236)	cell-cell adhesion(GO:0016337);extracellular transport(GO:0006858);macrophage activation(GO:0042116);negative regulation of apoptotic process(GO:0043066);neurological system process(GO:0050877);proteolysis(GO:0006508);signal transduction(GO:0007165)
Tight junction protein ZO-1		anatomical structure morphogenesis(GO:0009653);cellular process(GO:0009987)	plasma membrane(GO:0005886)
Tight junction protein ZO-1		anatomical structure morphogenesis(GO:0009653);cellular process(GO:0009987)	plasma membrane(GO:0005886)
Serine protease inhibitor Kazal-type 5	protein binding(GO:0005515)
Serine protease inhibitor Kazal-type 5	protein binding(GO:0005515)
Serine protease inhibitor Kazal-type 5	protein binding(GO:0005515)
Serine protease inhibitor Kazal-type 5	protein binding(GO:0005515)
Serine protease inhibitor Kazal-type 5	protein binding(GO:0005515)
Protein-methionine sulfoxide oxidase MICAL1	actin binding(GO:0003779);structural constituent of cytoskeleton(GO:0005200)	cellular component morphogenesis(GO:0032989);cellular process(GO:0009987)	actin cytoskeleton(GO:0015629);intracellular(GO:0005622)
Protein-methionine sulfoxide oxidase MICAL1	actin binding(GO:0003779);structural constituent of cytoskeleton(GO:0005200)	cellular component morphogenesis(GO:0032989);cellular process(GO:0009987)	actin cytoskeleton(GO:0015629);intracellular(GO:0005622)
Soluble scavenger receptor cysteine-rich domain-containing protein SSC5D	oxidoreductase activity(GO:0016491);receptor activity(GO:0004872);serine-type peptidase activity(GO:0008236)	cell-cell adhesion(GO:0016337);extracellular transport(GO:0006858);immune system process(GO:0002376);negative regulation of apoptotic process(GO:0043066);proteolysis(GO:0006508);signal transduction(GO:0007165)
Soluble scavenger receptor cysteine-rich domain-containing protein SSC5D	oxidoreductase activity(GO:0016491);receptor activity(GO:0004872);serine-type peptidase activity(GO:0008236)	cell-cell adhesion(GO:0016337);extracellular transport(GO:0006858);immune system process(GO:0002376);negative regulation of apoptotic process(GO:0043066);proteolysis(GO:0006508);signal transduction(GO:0007165)
Lipoxygenase homology domain-containing protein 1	cation channel activity(GO:0005261)	cellular process(GO:0009987);response to abiotic stimulus(GO:0009628);response to external stimulus(GO:0009605)
Lipoxygenase homology domain-containing protein 1	cation channel activity(GO:0005261)	cellular process(GO:0009987);response to abiotic stimulus(GO:0009628);response to external stimulus(GO:0009605)
Glutamate receptor-interacting protein 2	nucleotide kinase activity(GO:0019201)	intracellular signal transduction(GO:0035556);neurological system process(GO:0050877);synaptic transmission(GO:0007268)	cell junction(GO:0030054);plasma membrane(GO:0005886)
Glutamate receptor-interacting protein 2	nucleotide kinase activity(GO:0019201)	intracellular signal transduction(GO:0035556);neurological system process(GO:0050877);synaptic transmission(GO:0007268)	cell junction(GO:0030054);plasma membrane(GO:0005886)
DNA (cytosine-5)-methyltransferase 1
DNA (cytosine-5)-methyltransferase 1
Dihydrolipoyllysine-residue acetyltransferase component of pyruvate dehydrogenase complex, mitochondrial	acetyltransferase activity(GO:0016407)	carbohydrate metabolic process(GO:0005975);coenzyme metabolic process(GO:0006732)
Dihydrolipoyllysine-residue acetyltransferase component of pyruvate dehydrogenase complex, mitochondrial	acetyltransferase activity(GO:0016407)	carbohydrate metabolic process(GO:0005975);coenzyme metabolic process(GO:0006732)
Interleukin enhancer-binding factor 3		RNA localization(GO:0006403);anterior/posterior axis specification(GO:0009948);apoptotic process(GO:0006915);neurological system process(GO:0050877);response to interferon-gamma(GO:0034341);spermatogenesis(GO:0007283)
Interleukin enhancer-binding factor 3		RNA localization(GO:0006403);anterior/posterior axis specification(GO:0009948);apoptotic process(GO:0006915);neurological system process(GO:0050877);response to interferon-gamma(GO:0034341);spermatogenesis(GO:0007283)
Neuralized-like protein 4	ubiquitin-protein ligase activity(GO:0004842)	cellular process(GO:0009987);developmental process(GO:0032502);gamete generation(GO:0007276)
Neuralized-like protein 4	ubiquitin-protein ligase activity(GO:0004842)	cellular process(GO:0009987);developmental process(GO:0032502);gamete generation(GO:0007276)
Neuralized-like protein 4	ubiquitin-protein ligase activity(GO:0004842)	cellular process(GO:0009987);developmental process(GO:0032502);gamete generation(GO:0007276)
Bifunctional glutamate/proline--tRNA ligase	RNA binding(GO:0003723);aminoacyl-tRNA ligase activity(GO:0004812)	biosynthetic process(GO:0009058);cellular amino acid metabolic process(GO:0006520);cellular process(GO:0009987);nitrogen compound metabolic process(GO:0006807);tRNA aminoacylation for protein translation(GO:0006418);tRNA metabolic process(GO:0006399)	cytoplasm(GO:0005737)
Bifunctional glutamate/proline--tRNA ligase	RNA binding(GO:0003723);aminoacyl-tRNA ligase activity(GO:0004812)	biosynthetic process(GO:0009058);cellular amino acid metabolic process(GO:0006520);cellular process(GO:0009987);nitrogen compound metabolic process(GO:0006807);tRNA aminoacylation for protein translation(GO:0006418);tRNA metabolic process(GO:0006399)	cytoplasm(GO:0005737)
Prothrombin	serine-type peptidase activity(GO:0008236)	blood coagulation(GO:0007596);proteolysis(GO:0006508)
Prothrombin	serine-type peptidase activity(GO:0008236)	blood coagulation(GO:0007596);proteolysis(GO:0006508)
Replication initiator 1
Replication initiator 1
SH2B adapter protein 1		B cell mediated immunity(GO:0019724);cellular defense response(GO:0006968);cellular process(GO:0009987)
SH2B adapter protein 1		B cell mediated immunity(GO:0019724);cellular defense response(GO:0006968);cellular process(GO:0009987)
Zinc finger protein 48
Zinc finger protein 48
Zinc finger protein 48
Zinc finger protein 48
Sushi, nidogen and EGF-like domain-containing protein 1	receptor activity(GO:0004872);receptor binding(GO:0005102)	cell-cell signaling(GO:0007267);developmental process(GO:0032502);immune system process(GO:0002376);regulation of transcription from RNA polymerase II promoter(GO:0006357);signal transduction(GO:0007165)
Sushi, nidogen and EGF-like domain-containing protein 1	receptor activity(GO:0004872);receptor binding(GO:0005102)	cell-cell signaling(GO:0007267);developmental process(GO:0032502);immune system process(GO:0002376);regulation of transcription from RNA polymerase II promoter(GO:0006357);signal transduction(GO:0007165)
CXXC-type zinc finger protein 1	DNA binding(GO:0003677)	DNA metabolic process(GO:0006259)
CXXC-type zinc finger protein 1	DNA binding(GO:0003677)	DNA metabolic process(GO:0006259)
Zinc finger protein 474
Zinc finger protein 474
Zinc finger protein 474
Zinc finger and BTB domain-containing protein 2	sequence-specific DNA binding transcription factor activity(GO:0003700)	transcription from RNA polymerase II promoter(GO:0006366)
Zinc finger and BTB domain-containing protein 2	sequence-specific DNA binding transcription factor activity(GO:0003700)	transcription from RNA polymerase II promoter(GO:0006366)
Zinc finger protein 385B	RNA binding(GO:0003723);protein binding(GO:0005515)	apoptotic process(GO:0006915);intracellular signal transduction(GO:0035556);regulation of biological process(GO:0050789);response to stimulus(GO:0050896)	intracellular(GO:0005622);nucleus(GO:0005634)
Zinc finger protein 385B	RNA binding(GO:0003723);protein binding(GO:0005515)	apoptotic process(GO:0006915);intracellular signal transduction(GO:0035556);regulation of biological process(GO:0050789);response to stimulus(GO:0050896)	intracellular(GO:0005622);nucleus(GO:0005634)
Zinc finger protein 385B	RNA binding(GO:0003723);protein binding(GO:0005515)	apoptotic process(GO:0006915);intracellular signal transduction(GO:0035556);regulation of biological process(GO:0050789);response to stimulus(GO:0050896)	intracellular(GO:0005622);nucleus(GO:0005634)
Thioredoxin domain-containing protein 5	protein disulfide isomerase activity(GO:0003756)	cellular component organization(GO:0016043);cellular process(GO:0009987);phagocytosis(GO:0006909);response to stress(GO:0006950)
Thioredoxin domain-containing protein 5	protein disulfide isomerase activity(GO:0003756)	cellular component organization(GO:0016043);cellular process(GO:0009987);phagocytosis(GO:0006909);response to stress(GO:0006950)
Apolipoprotein(a)	serine-type peptidase activity(GO:0008236)	proteolysis(GO:0006508)	extracellular region(GO:0005576)
Apolipoprotein(a)	serine-type peptidase activity(GO:0008236)	proteolysis(GO:0006508)	extracellular region(GO:0005576)
Apolipoprotein(a)	serine-type peptidase activity(GO:0008236)	proteolysis(GO:0006508)	extracellular region(GO:0005576)
Apolipoprotein(a)	serine-type peptidase activity(GO:0008236)	proteolysis(GO:0006508)	extracellular region(GO:0005576)
Apolipoprotein(a)	serine-type peptidase activity(GO:0008236)	proteolysis(GO:0006508)	extracellular region(GO:0005576)
Apolipoprotein(a)	serine-type peptidase activity(GO:0008236)	proteolysis(GO:0006508)	extracellular region(GO:0005576)
Apolipoprotein(a)	serine-type peptidase activity(GO:0008236)	proteolysis(GO:0006508)	extracellular region(GO:0005576)
Apolipoprotein(a)	serine-type peptidase activity(GO:0008236)	proteolysis(GO:0006508)	extracellular region(GO:0005576)
Apolipoprotein(a)	serine-type peptidase activity(GO:0008236)	proteolysis(GO:0006508)	extracellular region(GO:0005576)
Apolipoprotein(a)	serine-type peptidase activity(GO:0008236)	proteolysis(GO:0006508)	extracellular region(GO:0005576)
Apolipoprotein(a)	serine-type peptidase activity(GO:0008236)	proteolysis(GO:0006508)	extracellular region(GO:0005576)
Apolipoprotein(a)	serine-type peptidase activity(GO:0008236)	proteolysis(GO:0006508)	extracellular region(GO:0005576)
Apolipoprotein(a)	serine-type peptidase activity(GO:0008236)	proteolysis(GO:0006508)	extracellular region(GO:0005576)
Apolipoprotein(a)	serine-type peptidase activity(GO:0008236)	proteolysis(GO:0006508)	extracellular region(GO:0005576)
Apolipoprotein(a)	serine-type peptidase activity(GO:0008236)	proteolysis(GO:0006508)	extracellular region(GO:0005576)
Apolipoprotein(a)	serine-type peptidase activity(GO:0008236)	proteolysis(GO:0006508)	extracellular region(GO:0005576)
Apolipoprotein(a)	serine-type peptidase activity(GO:0008236)	proteolysis(GO:0006508)	extracellular region(GO:0005576)
Apolipoprotein(a)	serine-type peptidase activity(GO:0008236)	proteolysis(GO:0006508)	extracellular region(GO:0005576)
Apolipoprotein(a)	serine-type peptidase activity(GO:0008236)	proteolysis(GO:0006508)	extracellular region(GO:0005576)
Apolipoprotein(a)	serine-type peptidase activity(GO:0008236)	proteolysis(GO:0006508)	extracellular region(GO:0005576)
Apolipoprotein(a)	serine-type peptidase activity(GO:0008236)	proteolysis(GO:0006508)	extracellular region(GO:0005576)
Apolipoprotein(a)	serine-type peptidase activity(GO:0008236)	proteolysis(GO:0006508)	extracellular region(GO:0005576)
Apolipoprotein(a)	serine-type peptidase activity(GO:0008236)	proteolysis(GO:0006508)	extracellular region(GO:0005576)
Apolipoprotein(a)	serine-type peptidase activity(GO:0008236)	proteolysis(GO:0006508)	extracellular region(GO:0005576)
Apolipoprotein(a)	serine-type peptidase activity(GO:0008236)	proteolysis(GO:0006508)	extracellular region(GO:0005576)
Apolipoprotein(a)	serine-type peptidase activity(GO:0008236)	proteolysis(GO:0006508)	extracellular region(GO:0005576)
Apolipoprotein(a)	serine-type peptidase activity(GO:0008236)	proteolysis(GO:0006508)	extracellular region(GO:0005576)
Apolipoprotein(a)	serine-type peptidase activity(GO:0008236)	proteolysis(GO:0006508)	extracellular region(GO:0005576)
Apolipoprotein(a)	serine-type peptidase activity(GO:0008236)	proteolysis(GO:0006508)	extracellular region(GO:0005576)
Apolipoprotein(a)	serine-type peptidase activity(GO:0008236)	proteolysis(GO:0006508)	extracellular region(GO:0005576)
Apolipoprotein(a)	serine-type peptidase activity(GO:0008236)	proteolysis(GO:0006508)	extracellular region(GO:0005576)
Apolipoprotein(a)	serine-type peptidase activity(GO:0008236)	proteolysis(GO:0006508)	extracellular region(GO:0005576)
Apolipoprotein(a)	serine-type peptidase activity(GO:0008236)	proteolysis(GO:0006508)	extracellular region(GO:0005576)
Apolipoprotein(a)	serine-type peptidase activity(GO:0008236)	proteolysis(GO:0006508)	extracellular region(GO:0005576)
Apolipoprotein(a)	serine-type peptidase activity(GO:0008236)	proteolysis(GO:0006508)	extracellular region(GO:0005576)
Zinc finger protein 579	sequence-specific DNA binding transcription factor activity(GO:0003700)	regulation of transcription from RNA polymerase II promoter(GO:0006357)
Zinc finger protein 579	sequence-specific DNA binding transcription factor activity(GO:0003700)	regulation of transcription from RNA polymerase II promoter(GO:0006357)
SPARC-related modular calcium-binding protein 1	calcium ion binding(GO:0005509)
SPARC-related modular calcium-binding protein 1	calcium ion binding(GO:0005509)
E3 ubiquitin-protein ligase Mdm2	chromatin binding(GO:0003682);nucleic acid binding(GO:0003676);ubiquitin-protein ligase activity(GO:0004842)	cellular process(GO:0009987);nucleobase-containing compound metabolic process(GO:0006139)
E3 ubiquitin-protein ligase Mdm2	chromatin binding(GO:0003682);nucleic acid binding(GO:0003676);ubiquitin-protein ligase activity(GO:0004842)	cellular process(GO:0009987);nucleobase-containing compound metabolic process(GO:0006139)
Ephrin type-A receptor 4		nervous system development(GO:0007399)
Ephrin type-A receptor 4		nervous system development(GO:0007399)
CCR4-NOT transcription complex subunit 1	protein binding(GO:0005515);structural molecule activity(GO:0005198)	RNA catabolic process(GO:0006401);biosynthetic process(GO:0009058);catabolic process(GO:0009056);cellular process(GO:0009987);nitrogen compound metabolic process(GO:0006807);regulation of translation(GO:0006417)	cytoplasm(GO:0005737);organelle(GO:0043226);protein complex(GO:0043234);ribonucleoprotein complex(GO:0030529)
CCR4-NOT transcription complex subunit 1	protein binding(GO:0005515);structural molecule activity(GO:0005198)	RNA catabolic process(GO:0006401);biosynthetic process(GO:0009058);catabolic process(GO:0009056);cellular process(GO:0009987);nitrogen compound metabolic process(GO:0006807);regulation of translation(GO:0006417)	cytoplasm(GO:0005737);organelle(GO:0043226);protein complex(GO:0043234);ribonucleoprotein complex(GO:0030529)
Telomeric repeat-binding factor 2	double-stranded DNA binding(GO:0003690)	DNA metabolic process(GO:0006259);cellular process(GO:0009987);homeostatic process(GO:0042592);nitrogen compound metabolic process(GO:0006807);organelle organization(GO:0006996)	intracellular(GO:0005622);nuclear chromosome(GO:0000228);nucleus(GO:0005634);protein-DNA complex(GO:0032993)
Telomeric repeat-binding factor 2	double-stranded DNA binding(GO:0003690)	DNA metabolic process(GO:0006259);cellular process(GO:0009987);homeostatic process(GO:0042592);nitrogen compound metabolic process(GO:0006807);organelle organization(GO:0006996)	intracellular(GO:0005622);nuclear chromosome(GO:0000228);nucleus(GO:0005634);protein-DNA complex(GO:0032993)
Ligand of Numb protein X 2		cellular process(GO:0009987)
Ligand of Numb protein X 2		cellular process(GO:0009987)
Zinc finger protein 236	sequence-specific DNA binding transcription factor activity(GO:0003700)	regulation of transcription from RNA polymerase II promoter(GO:0006357)
Zinc finger protein 236	sequence-specific DNA binding transcription factor activity(GO:0003700)	regulation of transcription from RNA polymerase II promoter(GO:0006357)
Eukaryotic translation initiation factor 2-alpha kinase 4	protein kinase activity(GO:0004672)	mitosis(GO:0007067);response to stress(GO:0006950);translation(GO:0006412)
Eukaryotic translation initiation factor 2-alpha kinase 4	protein kinase activity(GO:0004672)	mitosis(GO:0007067);response to stress(GO:0006950);translation(GO:0006412)
PHD finger protein 12	DNA binding(GO:0003677);chromatin binding(GO:0003682);transcription cofactor activity(GO:0003712)	biosynthetic process(GO:0009058);cellular process(GO:0009987);nitrogen compound metabolic process(GO:0006807);regulation of nucleobase-containing compound metabolic process(GO:0019219);transcription, DNA-dependent(GO:0006351)	intracellular(GO:0005622);nucleus(GO:0005634)
PHD finger protein 12	DNA binding(GO:0003677);chromatin binding(GO:0003682);transcription cofactor activity(GO:0003712)	biosynthetic process(GO:0009058);cellular process(GO:0009987);nitrogen compound metabolic process(GO:0006807);regulation of nucleobase-containing compound metabolic process(GO:0019219);transcription, DNA-dependent(GO:0006351)	intracellular(GO:0005622);nucleus(GO:0005634)
Zinc fingers and homeoboxes protein 1	sequence-specific DNA binding transcription factor activity(GO:0003700);transcription cofactor activity(GO:0003712)	biosynthetic process(GO:0009058);cellular process(GO:0009987);nitrogen compound metabolic process(GO:0006807);regulation of transcription from RNA polymerase II promoter(GO:0006357)	intracellular(GO:0005622);nucleus(GO:0005634)
Zinc fingers and homeoboxes protein 1	sequence-specific DNA binding transcription factor activity(GO:0003700);transcription cofactor activity(GO:0003712)	biosynthetic process(GO:0009058);cellular process(GO:0009987);nitrogen compound metabolic process(GO:0006807);regulation of transcription from RNA polymerase II promoter(GO:0006357)	intracellular(GO:0005622);nucleus(GO:0005634)
Sorbin and SH3 domain-containing protein 2
Sorbin and SH3 domain-containing protein 2
Paternally-expressed gene 3 protein	sequence-specific DNA binding RNA polymerase II transcription factor activity(GO:0000981)	biosynthetic process(GO:0009058);cellular process(GO:0009987);nitrogen compound metabolic process(GO:0006807)	intracellular(GO:0005622);nucleus(GO:0005634)
Paternally-expressed gene 3 protein	sequence-specific DNA binding RNA polymerase II transcription factor activity(GO:0000981)	biosynthetic process(GO:0009058);cellular process(GO:0009987);nitrogen compound metabolic process(GO:0006807)	intracellular(GO:0005622);nucleus(GO:0005634)
Paternally-expressed gene 3 protein	sequence-specific DNA binding RNA polymerase II transcription factor activity(GO:0000981)	biosynthetic process(GO:0009058);cellular process(GO:0009987);nitrogen compound metabolic process(GO:0006807)	intracellular(GO:0005622);nucleus(GO:0005634)
Neutrophil cytosol factor 2	oxidoreductase activity(GO:0016491)	immune response(GO:0006955)
Neutrophil cytosol factor 2	oxidoreductase activity(GO:0016491)	immune response(GO:0006955)
Membrane-associated guanylate kinase, WW and PDZ domain-containing protein 2	nucleotide kinase activity(GO:0019201)	intracellular signal transduction(GO:0035556);neurological system process(GO:0050877);synaptic transmission(GO:0007268)	cell junction(GO:0030054);plasma membrane(GO:0005886)
Membrane-associated guanylate kinase, WW and PDZ domain-containing protein 2	nucleotide kinase activity(GO:0019201)	intracellular signal transduction(GO:0035556);neurological system process(GO:0050877);synaptic transmission(GO:0007268)	cell junction(GO:0030054);plasma membrane(GO:0005886)
Membrane-associated guanylate kinase, WW and PDZ domain-containing protein 2	nucleotide kinase activity(GO:0019201)	intracellular signal transduction(GO:0035556);neurological system process(GO:0050877);synaptic transmission(GO:0007268)	cell junction(GO:0030054);plasma membrane(GO:0005886)
Membrane-associated guanylate kinase, WW and PDZ domain-containing protein 2	nucleotide kinase activity(GO:0019201)	intracellular signal transduction(GO:0035556);neurological system process(GO:0050877);synaptic transmission(GO:0007268)	cell junction(GO:0030054);plasma membrane(GO:0005886)
Zinc finger and SCAN domain-containing protein 32	sequence-specific DNA binding RNA polymerase II transcription factor activity(GO:0000981)	biosynthetic process(GO:0009058);cellular process(GO:0009987);nitrogen compound metabolic process(GO:0006807)	intracellular(GO:0005622);nucleus(GO:0005634)
Zinc finger and SCAN domain-containing protein 32	sequence-specific DNA binding RNA polymerase II transcription factor activity(GO:0000981)	biosynthetic process(GO:0009058);cellular process(GO:0009987);nitrogen compound metabolic process(GO:0006807)	intracellular(GO:0005622);nucleus(GO:0005634)
Nucleolar transcription factor 1
Nucleolar transcription factor 1
Nucleolar transcription factor 1
SH2B adapter protein 3		B cell mediated immunity(GO:0019724);cellular defense response(GO:0006968);cellular process(GO:0009987)
SH2B adapter protein 3		B cell mediated immunity(GO:0019724);cellular defense response(GO:0006968);cellular process(GO:0009987)
Multiple PDZ domain protein		cellular process(GO:0009987)
Multiple PDZ domain protein		cellular process(GO:0009987)
Multiple PDZ domain protein		cellular process(GO:0009987)
Multiple PDZ domain protein		cellular process(GO:0009987)
